# 1 **Genomic diversity affects the accuracy of bacterial SNP calling pipelines**

2

3 Stephen J. Bush<sup>1,2\*</sup>, Dona Foster<sup>1,3</sup>, David W. Eyre<sup>1</sup>, Emily L. Clark<sup>4</sup>, Nicola De Maio<sup>1</sup>, Liam  
4 P. Shaw<sup>1</sup>, Nicole Stoesser<sup>1</sup>, Tim E. A. Peto<sup>1,2,3</sup>, Derrick W. Crook<sup>1,2,3</sup>, A. Sarah Walker<sup>1,2,3</sup>

5

6 <sup>1</sup> Nuffield Department of Medicine, University of Oxford, Oxford, UK

7 <sup>2</sup> National Institute for Health Research Health Research Protection Unit in Healthcare

8 Associated Infections and Antimicrobial Resistance at University of Oxford in partnership

9 with Public Health England, Oxford, UK

10 <sup>3</sup> National Institute for Health Research Oxford Biomedical Research Centre, Oxford, UK

11 <sup>4</sup> The Roslin Institute and Royal (Dick) School of Veterinary Studies, University of

12 Edinburgh, Edinburgh, UK

13

14 \* corresponding author

15

## 16 **Abstract**

17

### 18 **Background**

19 Accurately identifying SNPs from bacterial sequencing data is an essential requirement for  
20 using genomics to track transmission and predict important phenotypes such as antimicrobial  
21 resistance. However, most previous performance evaluations of SNP calling have been  
22 restricted to eukaryotic (human) data. Additionally, bacterial SNP calling requires choosing  
23 an appropriate reference genome to align reads to, which, together with the bioinformatic  
24 pipeline, affects the accuracy and completeness of a set of SNP calls obtained.

25 This study evaluates the performance of 41 SNP calling pipelines using simulated data from  
26 254 strains of 10 clinically common bacteria and real data from environmentally-sourced and  
27 genomically diverse isolates within the genera *Citrobacter*, *Enterobacter*, *Escherichia* and  
28 *Klebsiella*.

29

### 30 **Results**

31 We evaluated the performance of 41 SNP calling pipelines, aligning reads to genomes of the  
32 same or a divergent strain. Irrespective of pipeline, a principal determinant of reliable SNP  
33 calling was reference genome selection. Across multiple taxa, there was a strong inverse  
34 relationship between pipeline sensitivity and precision, and the Mash distance (a proxy for

35 average nucleotide divergence) between reads and reference genome. The effect was  
36 especially pronounced for diverse, recombinogenic, bacteria such as *Escherichia coli*, but less  
37 dominant for clonal species such as *Mycobacterium tuberculosis*.

38

### 39 **Conclusions**

40 The accuracy of SNP calling for a given species is compromised by increasing intra-species  
41 diversity. When reads were aligned to the same genome from which they were sequenced,  
42 among the highest performing pipelines was Novoalign/GATK. However, across the full  
43 range of (divergent) genomes, among the consistently highest-performing pipelines was  
44 Snippy.

45

### 46 **Introduction**

47

48 Accurately identifying single nucleotide polymorphism (SNPs) from bacterial DNA is  
49 essential for monitoring outbreaks (as in [1, 2]) and predicting phenotypes, such as  
50 antimicrobial resistance [3], although the pipeline selected for this task strongly impacts the  
51 outcome [4]. Current bacterial sequencing technologies generate short fragments of DNA  
52 sequence ('reads') from which the bacterial genome can be reconstructed. Reference-based  
53 mapping approaches use a known reference genome to guide this process, using a  
54 combination of an aligner, which identifies the location in the genome each read is likely to  
55 have arisen from, and a variant caller, which summarises the available information at each  
56 site to identify variants including SNPs and indels (see reviews for an overview of alignment  
57 [5, 6] and SNP calling [7] algorithms). This evaluation focuses only on SNP calling; we did  
58 not evaluate indel calling as this can require different algorithms (see review [8]).

59 The output from different aligner/caller combinations is often poorly concordant. For  
60 example, up to 5% of SNPs are uniquely called by one of five different pipelines [9] with  
61 even lower agreement upon structural variants [10].

62

63 Although a mature field, systematic evaluations of variant calling pipelines are often limited  
64 to eukaryotic data, usually human [11-15] but also *C. elegans* [16] and dairy cattle [17] (see  
65 also review [18]). This is because truth sets of known variants, such as the Illumina Platinum  
66 Genomes [19], are relatively few in number and human-centred, being expensive to create  
67 and biased toward the methods that produced them [20]. As such, to date, bacterial SNP

68 calling evaluations are comparatively limited in scope (for example, comparing 4 aligners  
69 with 1 caller, mpileup [21], using *Listeria monocytogenes* [22]).

70

71 Relatively few truth sets exist for bacteria and so the choice of pipeline for bacterial SNP  
72 calling is often informed by performance on human data. Many evaluations conclude in  
73 favour of the publicly-available BWA-mem [23] or commercial Novoalign  
74 ([www.novocraft.com](http://www.novocraft.com)) as choices of aligner, and GATK [24, 25] or mpileup as variant callers,  
75 with recommendations for a default choice of pipeline, independent of specific analytic  
76 requirements, including Novoalign followed by GATK [26], and BWA-mem followed by  
77 either mpileup [14], GATK [12], or VarDict [11].

78

79 This study evaluates a range of SNP calling pipelines across multiple bacterial species, both  
80 when reads are sequenced from and aligned to the same genome, and when reads are aligned  
81 to a representative genome of that species. In order to cover a broad range of methodological  
82 approaches, we assessed the combination of 4 commonly used short read aligners (BWA-  
83 mem [23], minimap2 [27], Novoalign and Stampy [28]) and 10 variant callers (16GT [29],  
84 Freebayes [30], GATK HaplotypeCaller [24, 25], LoFreq [31], mpileup [21], Platypus [32],  
85 SNVer [33], SNVSniffer [34], Strelka [35] and VarScan [36]), alongside Snippy  
86 (<https://github.com/tseemann/snippy>), a haploid core variant calling pipeline constituting a  
87 bespoke aligner/caller combination of BWA-mem, minimap2, and Freebayes. Reasons for  
88 excluding other programs are detailed in Supplementary Text 1.

89

90 To evaluate each pipeline, we simulated 3 sets of 150bp and 3 sets of 300bp reads  
91 (characteristic of the Illumina NextSeq and MiSeq platforms, respectively) at 50-fold depth  
92 from 254 strains of 10 clinically common species (2 to 36 strains per species), each with fully  
93 sequenced (closed) core genomes: the Gram-positive *Clostridioides difficile* (formerly  
94 *Clostridium difficile* [37]), *Listeria monocytogenes*, *Staphylococcus aureus*, and  
95 *Streptococcus pneumoniae* (all Gram-positive), *Escherichia coli*, *Klebsiella pneumoniae*,  
96 *Neisseria gonorrhoeae*, *Salmonella enterica*, and *Shigella dysenteriae* (all Gram-negative),  
97 and *Mycobacterium tuberculosis*. For each strain, we evaluated all pipelines using two  
98 different genomes for alignment: one being the same genome from which the reads were  
99 simulated, and one being the NCBI ‘reference genome’, a high-quality (but essentially  
100 arbitrary) representative of that species, typically chosen on the basis of assembly and  
101 annotation quality, available experimental support, and/or wide recognition as a community

102 standard (such as *C. difficile* 630, the first sequenced strain for that species [38]). We added  
103 approximately 8000-25,000 SNPs *in silico* to each genome, equivalent to 5 SNPs per genic  
104 region, or 1 SNP per 60-120 bases.

105

106 While simulation studies can offer useful insight, they can be sensitive to the specific details  
107 of the simulations. Therefore, we also evaluated performance on real data to verify our  
108 conclusions. We used 16 environmentally-sourced and genomically diverse Gram-negative  
109 species of the genera *Citrobacter*, *Enterobacter*, *Escherichia* and *Klebsiella*, along with two  
110 reference strains, from which closed hybrid *de novo* assemblies were previously generated  
111 using both Illumina (short) and ONT (long; Oxford Nanopore Technologies) reads [39].

112

113 All pipelines aim to call variants with high specificity (i.e. high proportion of non-variant  
114 sites in the truth set correctly identified as the reference allele by the pipeline) and high  
115 sensitivity (i.e. high proportion of true SNPs found by the pipeline, a.k.a. recall). The optimal  
116 trade-off between these two properties may vary depending on the application. For example,  
117 in transmission inference, minimising false positive SNP calls (i.e. high specificity), is likely  
118 to be most important, whereas high sensitivity may be more important when identifying  
119 variants associated with antibiotic resistance. We therefore report detailed performance  
120 metrics for all pipelines, including recall/sensitivity, precision (a.k.a. positive predictive  
121 value, the proportion of SNPs identified that are true SNPs), and the F-score, the harmonic  
122 mean of precision and recall [40].

123

## 124 **Results**

125

### 126 ***Evaluating SNP calling pipelines when the genome for alignment is also the source of the*** 127 ***reads***

128 The performance of 41 SNP calling pipelines (Supplementary Table 1) was first evaluated  
129 using reads simulated from 254 closed bacterial genomes (Supplementary Table 2), as  
130 illustrated in Figure 1. In order to exclude biases introduced during other parts of the  
131 workflow, such as DNA library preparation and sequencing error, reads were simulated error-  
132 free. There was negligible difference in performance when reads were simulated with  
133 sequencing errors (see Supplementary Text 1).

134

135 This dataset contains 62,484 VCFs (comprising 2 read lengths [150 and 300bp] \* 3 replicates  
136 \* 254 genomes \* 41 pipelines). The number of reads simulated from each species and the  
137 performance statistics for each pipeline – the number of true positives (TP), false positives  
138 (FP) and false negatives (FN), precision, recall, F-score, and total number of errors (i.e. FP +  
139 FN) per million sequenced bases – are given in Supplementary Table 3, with the distribution  
140 of F-scores illustrated in Figure 2A.

141

142 Median F-scores were over 0.99 for all but four aligner/callers with small interquartile ranges  
143 (approx. 0.005), although outliers were nevertheless notable (Figure 2A), suggesting that  
144 reference genome can affect performance of a given pipeline.

145

146 Table 1 shows the top ranked pipelines averaged across all species' genomes, based on 7  
147 different performance measures and on the sum of their ranks (which constitutes an 'overall  
148 performance' measure, lower values indicating higher overall performance). Supplementary  
149 Table 4 shows the sum of ranks for each pipeline per species, with several variant callers  
150 consistently found among the highest-performing (Freebayes and GATK) and lowest-  
151 performing pipelines (16GT and SNVSniffer), irrespective of aligner.

152

153 If considering performance across all species, Novoalign/GATK has the highest median F-  
154 score (0.994), lowest sum of ranks (10), the lowest number of errors per million sequenced  
155 bases (0.944), and the largest absolute number of true positive calls (15,778) (Table 1).

156 However, in this initial simulation, as the reads are error-free and the reference genome is the  
157 same as the source of the reads, many pipelines avoid false positive calls and report a perfect  
158 precision of 1.

159

### 160 ***Evaluating SNP calling pipelines when the genome for alignment diverges from the source*** 161 ***of the reads***

162 Due to the high genomic diversity of some bacterial species, the appropriate selection of  
163 reference genomes is non-trivial. To assess how pipeline performance is affected by  
164 divergence between the source and reference genomes, SNPs were re-called after mapping all  
165 reads to a single representative genome for that species (illustrated in Figure 1). To identify  
166 true variants, closed genomes were aligned against the representative genome using both  
167 nucmer [41] and Parsnp [42], with consensus calls identified within one-to-one alignment  
168 blocks (see Methods). Estimates of the distance between each genome and the representative

169 genome are given in Supplementary Table 2, with the genomic diversity of each species  
170 summarised in Supplementary Table 5. We quantified genomic distances using the Mash  
171 distance, which reflects the proportion of k-mers shared between a pair of genomes as a  
172 proxy for average nucleotide divergence [43]. The performance statistics for each pipeline are  
173 shown in Supplementary Table 6, with an associated ranked summary in Supplementary  
174 Table 7.

175 In general, aligning reads from one strain to a divergent reference leads to a decrease in  
176 median F-score and increase in interquartile range of the F-score distribution, with pipeline  
177 performance more negatively affected by choice of aligner than caller (Figure 2B).

178  
179 Although across the full range of genomes, many pipelines show comparable performance  
180 (Figure 2B), there was a strong negative correlation between the Mash distance and F-score  
181 (Spearman's  $\rho = -0.72$ ,  $p < 10^{-15}$ ; Figure 3A). The negative correlation between F-score and  
182 the total number of SNPs between the strain and representative genome, i.e. the set of strain-  
183 specific *in silico* SNPs plus inter-strain SNPs, was slightly weaker ( $\rho = -0.58$ ,  $p < 10^{-15}$ ;  
184 Supplementary Figure 1). This overall reduction in performance with increased divergence  
185 was more strongly driven by reductions in recall (i.e., by an increased number of false  
186 negative calls) rather than precision as there was a particularly strong correlation between  
187 distance and recall (Spearman's  $\rho = -0.94$ ,  $p < 10^{-15}$ ; Supplementary Figure 2).

188  
189 Three commonly used pipelines – BWA-mem/Freebayes, BWA-mem/GATK and  
190 Novoalign/GATK – were among the highest performers when the reference genome is also  
191 the source of the reads (Table 1 and Supplementary Table 4). However, when the reference  
192 diverges from the reads, then considering the two ‘overall performance’ measures across the  
193 set of 10 species, Snippy instead has both the lowest sum of ranks (20) and the highest  
194 median F-score (0.982), along with the lowest number of errors per million sequenced bases  
195 (2.6) (Table 1).

196  
197 Performance per species is shown in Table 2, alongside both the overall sum and range of  
198 these ranks per pipeline. Pipelines featuring Novoalign were, in general, consistently high-  
199 performing across the majority of species (that is, having a lower sum of ranks), although  
200 were outperformed by Snippy, which had both strong and uniform performance across all  
201 species (Table 2). By contrast, pipelines with a larger range of ranks had more inconsistent

202 performance, such as minimap2/SNVer, which for example performed relatively strongly for  
203 *N. gonorrhoeae* but poorly for *S. dysenteriae* (Table 2).

204

205 While, in general, the accuracy of SNP calling declined with increasing genetic distances,  
206 some pipelines were more stable than others (Figure 3B). If considering the median  
207 difference in F-score between SNP calls made using the same versus a representative  
208 genome, Snippy had smaller differences as the distance between genomes increased (Figure  
209 4).

210

211 The highest ranked pipelines in Table 2 had small, but practically unimportant, differences in  
212 median F-score and so are arguably equivalently strong candidates for a ‘general purpose’  
213 SNP calling solution. For instance, on the basis of F-score alone the performance of  
214 Novoalign/mpileup is negligibly different from BWA-mem/mpileup (Figure 5). However,  
215 when directly comparing pipelines, similarity of F-score distributions (see Figure 2B) can  
216 conceal larger differences in either precision or recall, categorised using the effect size  
217 estimator Cliff’s delta [44, 45]. Thus, certain pipelines may be preferred if the aim is to  
218 minimise false positive (e.g. for transmission analysis) or maximise true positive (e.g. to  
219 identify antimicrobial resistance loci) calls. For instance, although Snippy (the top ranked  
220 pipeline in Table 2) is negligibly different from Novoalign/mpileup (the third ranked  
221 pipeline) in terms of F-score and precision, the former is more sensitive (Figure 5).

222

### 223 ***Comparable accuracy of SNP calling pipelines if using real rather than simulated*** 224 ***sequencing data***

225 We used real sequencing data from a previous study comprising 16 environmentally-sourced  
226 Gram-negative isolates (all *Enterobacteriaceae*), derived from livestock farms, sewage, and  
227 rivers, and cultures of two reference strains (*K. pneumoniae* subsp. *pneumoniae* MGH 78578  
228 and *E. coli* CFT073), for which closed hybrid *de novo* assemblies were generated using both  
229 Illumina paired-end short reads and Nanopore long reads [46]. Source locations for each  
230 sample, species predictions and NCBI accession numbers are detailed in Supplementary  
231 Table 8. The performance statistics for each pipeline are shown in Supplementary Table 9,  
232 with an associated ranked summary in Supplementary Table 10.

233

234 Lower performance was anticipated for all pipelines, particularly for *Citrobacter* and  
235 *Enterobacter* isolates, which had comparatively high Mash distances (> 0.08) between the

236 reads and the representative genome (Supplementary Table 8), far greater than those in the  
237 simulations (241 of the 254 simulated genomes had a Mash distance to the representative  
238 genome of  $< 0.04$ ; Supplementary Table 2). Consistent with the simulations (Figure 3A),  
239 there was a strong negative correlation between Mash distance and the median F-score across  
240 all pipelines (Spearman's  $\rho = -0.83$ ,  $p = 3.36 \times 10^{-5}$ ; Figure 6A), after excluding one  
241 prominent outlier (*E. coli* isolate RHB11-C04; see Supplementary Table 8).

242

243 Notably, the median precision of each pipeline, if calculated across the divergent set of  
244 simulated genomes, strongly correlated with the median precision calculated across the set of  
245 real genomes (Spearman's  $\rho = 0.83$ ,  $p = 2.81 \times 10^{-11}$ ; Figure 6B). While a weaker correlation  
246 was seen between simulated and real datasets on the basis of recall (Spearman's  $\rho = 0.41$ ,  $p$   
247  $= 0.007$ ), this is consistent with the high diversity of *Enterobacteriaceae*, and the accordingly  
248 greater number of false negative calls with increased divergence (Supplementary Figure 2).

249

250 Overall, this suggests that the accuracy of a given pipeline on simulated data is a reasonable  
251 proxy for its performance on real data. While the poorer performing pipelines when using  
252 simulated data are similarly poorer performing when using real data, the top ranked pipelines  
253 differ, predominantly featuring BWA-mem, rather than Novoalign, as an aligner  
254 (Supplementary Table 10). In both cases, however, among the consistently highest  
255 performing pipelines is Snippy.

256

## 257 **Discussion**

258

### 259 ***Reference genome selection strongly affects SNP calling performance***

260 Here we have evaluated 41 SNP calling pipelines, the combination of 4 aligners with 10  
261 callers, plus one self-contained pipeline, Snippy, using reads simulated from 10 clinically  
262 relevant species. These reads were first aligned back to their source genome and SNPs called.  
263 As expected under these conditions, the majority of SNP calling pipelines showed high  
264 precision and sensitivity, although between-species variation was prominent.

265

266 We next introduced a degree of divergence between the reference genome and the reads,  
267 analogous to having an accurate species-level classification of the reads but no specific  
268 knowledge of the strain. For the purposes of this study, we assumed that reference genome  
269 selection was essentially arbitrary, equivalent to a community standard representative



270 genome. Such a genome can differ significantly from the sequenced strain, which  
271 complicates SNP calling by introducing inter-specific variation between the sequenced reads  
272 and the reference. Importantly, all pipelines in this study are expected to perform well if  
273 evaluated with human data, i.e. when there is a negligible Mash distance between the reads  
274 and the reference. For example, the mean Mash distance between human assembly  
275 GRCh38.p12 and the 3 Ashkenazi assemblies of the Genome In A Bottle dataset (deep  
276 sequencing of a mother, father and son trio [47-49], available under ENA study accession  
277 PRJNA200694 and GenBank assembly accessions GCA\_001549595.1, GCA\_001549605.1,  
278 and GCA\_001542345.1, respectively) is 0.001 (i.e., consistent with previous findings that the  
279 majority of the human genome has approximately 0.1% sequence divergence [50]). Notably,  
280 the highest performing pipeline when reads were aligned to the same genome from which  
281 they were simulated, Novoalign/GATK, was also that used by the Genome In A Bottle  
282 consortium to align human reads to the reference [47].

283

284 While tools initially benchmarked on human data, such as SNVSniffer [34], can in principle  
285 also be used on bacterial data, this study shows that in practice many perform poorly. For  
286 example, the representative *C. difficile* strain, 630, has a mosaic genome, approximately 11%  
287 of which comprises mobile genetic elements [38]. With the exception of reads simulated from  
288 *C. difficile* genomes which are erythromycin-sensitive derivatives of 630 (strains 630Derm  
289 and 630deltaerm; see [51]), aligning reads to 630 compromises accurate SNP calling,  
290 resulting in a lower median F-score across all pipelines (Figure 3A). We also observed  
291 similar decreases in F-score for more recombinogenic species such as *N. gonorrhoeae*, which  
292 has a phase-variable gene repertoire [52] and has been used to illustrate the ‘fuzzy species’  
293 concept, that recombinogenic bacteria do not form clear and distinct isolate clusters as  
294 assayed by phylogenies of common housekeeping loci [53, 54]. By contrast, for clonal  
295 species, such as those within the *M. tuberculosis* complex [55], the choice of reference  
296 genome has negligible influence on the phylogenetic relationships inferred from SNP calls  
297 [56] and, indeed, minimal effect on F-score.

298

299 In general, more diverse species have a broader range of Mash distances on Figure 2A  
300 (particularly notable for *E. coli*), as do those forming distinct phylogroups, such as the two  
301 clusters of *L. monocytogenes*, consistent with the division of this species into multiple  
302 primary genetic lineages [57-59].

303

304 Therefore, one major finding of this study is that, irrespective of the core components within  
305 a SNP calling pipeline, the selection of reference genome has a critical effect on output,  
306 particularly for more recombinogenic species. This can to some extent be mitigated by using  
307 variant callers that are more robust to increased distances between the reads and the  
308 reference, such as Freebayes (employed by Snippy).

309

310 A sub-optimal choice of reference genome has previously been shown to result in mapping  
311 errors, leading to biases in allelic proportions [60]. Heterologous reference genomes are in  
312 general sub-optimal for read mapping, even when there is strict correspondence between  
313 orthologous regions, with short reads particularly vulnerable to false positive alignments [61].  
314 There is also an inverse relationship between true positive SNP calls and genetic distance,  
315 with a greater number of false positives when the reads diverge from the reference genome  
316 [22].

317

### 318 ***Study limitations***

319 The experimental design made several simplifying assumptions regarding pipeline usage.  
320 Most notably, when evaluating SNP calling when the reference genome diverges from the  
321 source of the reads, we needed to convert the coordinates of one genome to those of another,  
322 doing so by whole genome alignment. We took a similar approach to that used to evaluate  
323 Pilon, an all-in-one tool for correcting draft assemblies and variant calling [62], which made  
324 whole genome alignments of the *M. tuberculosis* F11 and H37Rv genomes and used the  
325 resulting set of inter-strain variants as a truth set for benchmarking (a method we also used  
326 when evaluating each pipeline on real data). While this approach assumes a high degree of  
327 contiguity for the whole genome alignment, there are nevertheless significant breaks in  
328 synteny between F11 and H37Rv, with two regions deemed particularly hypervariable, in  
329 which no variant could be confidently called [62]. For the strain-to-representative genome  
330 alignments in this study, we considered SNP calls only within one-to-one alignment blocks  
331 and cannot exclude the possibility that repetitive or highly mutable regions within these  
332 blocks have been misaligned. However, we did not seek to identify and exclude SNPs from  
333 these regions as, even if present, this would have a systematic negative effect on the  
334 performance of each pipeline.

335

336 Furthermore, when aligning reads from one genome to a different genome, it is not possible  
337 to recover all possible SNPs introduced with respect to the former, as some will be found

338 only within genes unique to the original genome (of which there can be many, as bacterial  
339 species have considerable genomic diversity; see Supplementary Table 5). Nevertheless,  
340 there is a strong relationship between the total number of SNPs introduced *in silico* into one  
341 genome and the maximum number of SNPs it is possible to call should reads instead be  
342 aligned to a divergent genome (Supplementary Figure 3). In any case, this does not affect the  
343 evaluation metrics used for pipeline evaluation, such as F-score, as these are based on  
344 proportional relationships of true positive, false positive and false negative calls at variant  
345 sites. However, we did not count true negative calls (and thereby assess pipeline specificity)  
346 as these can only be made at reference sites, a far greater number of which do not exist when  
347 aligning between divergent genomes.

348

349 While the programs chosen for this study are in common use and the findings generalisable, it  
350 is also important to note that they are a subset of the tools available (see Supplementary Text  
351 1). It is also increasingly common to construct more complex pipelines that call SNPs with  
352 one tool and structural variants with another (for example, in [63]). Here, our evaluation  
353 concerned only accurate SNP calling, irrespective of the presence of structural variants  
354 introduced by sub-optimal reference genome selection (that is, by aligning the reads to a  
355 divergent genome) and so does not test dedicated indel calling algorithms. Previous indel-  
356 specific variant calling evaluations, using human data, have recommended Platypus [8] or,  
357 for calling large indels at low read depths, Pindel [64].

358

359 Many of the findings in this evaluation are also based on simulated error-free data for which  
360 there was no clear need for pre-processing quality control. While adaptor removal and  
361 quality-trimming reads are recommended precautionary steps prior to analysing non-  
362 simulated data, previous studies differ as to whether pre-processing increases the accuracy of  
363 SNP calls [65], has minimal effect upon them [66], or whether benefits instead depend upon  
364 the aligner and reference genome used [22]. While more realistic datasets would be subject to  
365 sequencing error, we also expect this to be minimal: Illumina platforms have a per-base error  
366 rate < 0.01% [67]. Accordingly, when comparing pipelines taking either error-free or error-  
367 containing reads as input, sequencing error had negligible effect on performance (see  
368 Supplementary Text 1).

369

370 We have also assumed that given the small genome sizes of bacteria, a consistently high  
371 depth of coverage is expected in non-simulated datasets, and so have not evaluated pipeline

372 performance on this basis. In any case, a previous study found that with simulated NextSeq  
373 reads, variant calling sensitivity was largely unaffected by increases in coverage [40].

374

### 375 ***Recommendations for bacterial SNP calling***

376 Our results emphasise that one of the principal difficulties of alignment-based bacterial SNP  
377 calling is not pipeline selection *per se* but optimal reference genome selection (or,  
378 alternatively, its *de novo* creation, not discussed further). If assuming all input reads are from  
379 a single, unknown, origin, then in principle a reference genome could be predicted using a  
380 metagenomic classifier such as Centrifuge [68], Kaiju [69] or Kraken [70]. However,  
381 correctly identifying the source genome from even a set of single-origin reads is not  
382 necessarily simple with the performance of read classifiers depending in large part on the  
383 sequence database they query (such as, for instance, EMBL proGenomes [71] or NCBI  
384 RefSeq [72]), which can vary widely in scope, redundancy, and degree of curation (see  
385 performance evaluations [73, 74]). This is particularly evident among the *Citrobacter*  
386 samples in the real dataset, with 3 methods each making different predictions (Supplementary  
387 Table 8). Specialist classification tools such as Mykrobe [75] use customised, tightly curated,  
388 allele databases and perform highly for certain species (in this case, *M. tuberculosis* and *S.*  
389 *aureus*) although by definition do not have wider utility. An additional complication would  
390 also arise from taxonomic disputes such as, for example, *Shigella* spp. being essentially  
391 indistinct from *E. coli* [76].

392

393 One recommendation, which is quick and simple to apply, would be to test which of a set of  
394 candidate reference genomes is most suitable by estimating the distance between each  
395 genome and the reads. This can be accomplished using Mash [43], which creates ‘sketches’  
396 of sequence sets (compressed representations of their k-mer distributions) and then estimates  
397 the Jaccard index (that is, the fraction of shared k-mers) between each pair of sequences.  
398 Mash distances are a proxy both for average nucleotide identity [43] and measures of genetic  
399 distance derived from the whole genome alignment of genome pairs (Supplementary Table  
400 2), correlating strongly with the total number of SNPs between the strain genome and the  
401 representative genome (Spearman’s  $\rho = 0.97$ ,  $p < 10^{-15}$ ), and to a reasonable degree with  
402 the proportion of bases unique to the strain genome (Spearman’s  $\rho = 0.48$ ,  $p < 10^{-15}$ ). More  
403 closely related genomes would have lower Mash distances and so be more suitable as  
404 reference genomes for SNP calling. Using a highly divergent genome (such as the  
405 representative *Enterobacter* genomes in the real dataset, each of which differs from the reads

406 by a Mash distance  $> 0.1$ ; Supplementary Table 8) is analogous to variant calling in a highly  
407 polymorphic region, such as the human leukocyte antigen, which shows  $> 10\%$  sequence  
408 divergence between haplotypes [50] (i.e., even for pipelines optimised for human data – the  
409 majority in this study – this would represent an anomalous use case).

410

411 Prior to using Mash (or other sketch-based distance-estimators, such as Dashing [77] or  
412 FastANI [78]), broad-spectrum classification tools such as Kraken could be used to narrow  
413 down the scope of the search space to a set of fully-sequenced candidate genomes, i.e. those  
414 genomes of the taxonomic rank to which the highest proportion of reads could be assigned  
415 with confidence.

416

417 In the future, reads from long-read sequencing platforms, such as Oxford Nanopore, are less  
418 likely to be ambiguously mapped within a genomic database and so in principle are simpler  
419 to classify (sequencing error rate notwithstanding), making it easier to select a suitable  
420 reference genome. However, long-read platforms can also, in principle if not yet routinely,  
421 generate complete *de novo* bacterial genomes [79] for downstream SNP calling, possibly  
422 removing the need to choose a reference entirely. Similarly, using a reference pan-genome  
423 instead of a singular representative genome could also maximise the number of SNP calls by  
424 reducing the number of genes not present in the reference [80].

425

426 If considering the overall performance of a pipeline as the sum of the 7 different ranks for the  
427 different metrics considered, then averaged across the full set of species' genomes, the  
428 highest performing pipelines are, with simulated data, Snippy and those utilising Novoalign  
429 in conjunction with LoFreq or mpileup (Table 2), and with real data, Snippy and those  
430 utilising BWA-mem in conjunction with Strelka or mpileup (Supplementary Table 10).

431

432 Some of the higher-performing tools apply error-correction models that also appear suited to  
433 bacterial datasets with high SNP density, despite their original primary use case being in  
434 different circumstances. For instance, SNVer (which in conjunction with BWA-mem, ranks  
435 second to Snippy for *N. gonorrhoeae*; see Table 2) implements a statistical model for calling  
436 SNPs from pooled DNA samples, where variant allele frequencies are not expected to be  
437 either 0, 0.5 or 1 [33]. SNP calling from heterogeneous bacterial populations with high  
438 mutation rates, in which only a proportion of cells may contain a given mutation, is also  
439 conceptually similar to somatic variant calling in human tumours, where considerable noise is

440 expected [60] (this is a recommended use case for Strelka, which performed highly on real  
441 data; Supplementary Table 10).

442

443 Irrespective of pipeline employed, increasing Mash distances between the reads and the  
444 reference increases the number of false negative calls (Supplementary Figure 2).  
445 Nevertheless, Snippy, which employs Freebayes, is particularly robust to this, being among  
446 the most sensitive pipelines (Figure 5 and Supplementary Figure 4). Notably, Freebayes is  
447 haplotype-based, calling variants based on the literal sequence of reads aligned to a particular  
448 location, so avoiding the problem of one read having multiple possible alignments  
449 (increasingly likely with increasing genomic diversity) but only being assigned to one of  
450 them. However, as distance increases further, it is likely that reads will cease being  
451 misaligned (which would otherwise increase the number of false positive calls) but rather  
452 they will not be aligned at all, being too dissimilar to the reference genome.

453

454 With an appropriate selection of reference genome, many of these higher-performing  
455 pipelines could be optimised to converge on similar results by tuning parameters and post-  
456 processing VCFs with specific filtering criteria, another routine task for which there are many  
457 different choices of application [81-84]. In this respect, the results of this study should be  
458 interpreted as a range-finding exercise, drawing attention to those SNP calling pipelines  
459 which, under default conditions, are generally higher-performing and which may be most  
460 straightforwardly optimised to meet user requirements.

461

## 462 **Conclusions**

463

464 We have performed a comparison of SNP calling pipelines across both simulated and real  
465 data in multiple bacterial species, allowing us to benchmark their performance for this  
466 specific use. We find that all pipelines show extensive species-specific variation in  
467 performance, which has not been apparent from the majority of existing, human-centred,  
468 benchmarking studies. While aligning to a single representative genome is common practice  
469 in eukaryotic SNP calling, in bacteria the sequence of this genome may diverge considerably  
470 from the sequence of the reads. A critical factor affecting the accuracy of SNP calling is thus  
471 the selection of a reference genome for alignment. This is complicated by ambiguity as to the  
472 strain of origin for a given set of reads, which is perhaps inevitable for many recombinogenic  
473 species, a consequence of the absence (or impossibility) of a universal species concept for

474 bacteria. For many clinically common species, excepting *M. tuberculosis*, the use of standard  
475 ‘representative’ reference genomes can compromise accurate SNP calling by disregarding  
476 genomic diversity. By first considering the Mash distance between the reads and a candidate  
477 set of reference genomes, a genome with minimal distance may be chosen that, in  
478 conjunction with one of the higher performing pipelines, can maximise the number of true  
479 variants called.

480

## 481 **Materials and Methods**

482

### 483 *Simulating truth sets of SNPs for pipeline evaluation*

484 264 genomes, representing a range of strains from 10 bacterial species, and their associated  
485 annotations, were obtained from the NCBI Genome database [85]  
486 (<https://www.ncbi.nlm.nih.gov/genome>, accessed 16<sup>th</sup> August 2018), as detailed in  
487 Supplementary Table 2. One genome per species is considered to be a representative genome  
488 (criteria detailed at <https://www.ncbi.nlm.nih.gov/refseq/about/prokaryotes/>, accessed 16<sup>th</sup>  
489 August 2018), indicated in Supplementary Table 2. Strains with incomplete genomes (that is,  
490 assembled only to the contig or scaffold level) or incomplete annotations (that is, with no  
491 associated GFF, necessary to obtain gene coordinates) were excluded, as were those with  
492 multiple available genomes (that is, the strain name was not unique). After applying these  
493 filters, all species were represented by approx. 30 complete genomes (28 *C. difficile*, 29 *M.*  
494 *tuberculosis* and 36 *S. pneumoniae*), with the exceptions of *N. gonorrhoeae* (n = 15) and *S.*  
495 *dysenteriae* (n = 2). For the 5 remaining species (*E. coli*, *K. pneumoniae*, *L. monocytogenes*,  
496 *S. aureus* and *S. enterica*), there are > 100 usable genomes each. As it was not  
497 computationally tractable to test every genome, we chose a subset of isolates based on  
498 stratified selection by population structure. We created all-against-all distance matrices using  
499 the ‘triangle’ component of Mash v2.1 [43], then constructed dendrograms (Supplementary  
500 Figures 5 to 9) from each matrix using the neighbour joining method, as implemented in  
501 MEGA v7.0.14 [86]. By manually reviewing the topology, 30 isolates were chosen per  
502 species to create a representative sample of its diversity.

503

504 For each genome used in this study, we excluded, if present, any non-chromosomal (i.e.  
505 circular plasmid) sequence. A simulated version of each core genome, with exactly 5  
506 randomly generated SNPs per genic region, was created using Simulome v1.2 [87] with  
507 parameters `--whole_genome=TRUE --snp=TRUE --num_snp=5`. As the coordinates of some

508 genes overlap, not all genes will contain simulated SNPs. The number of SNPs introduced  
509 into each genome (from approximately 8000 to 25,000) and the median distance between  
510 SNPs (from approximately 60 to 120 bases) is detailed in Supplementary Table 2.

511

512 The coordinates of each SNP inserted into a given genome are, by definition, genome- (that  
513 is, strain-) specific. As such, it is straightforward to evaluate pipeline performance when  
514 reads from one genome are aligned to the same reference. However, in order to evaluate  
515 pipeline performance when reads from one genome are aligned to the genome of a divergent  
516 strain (that is, the representative genome of that species), the coordinates of each strain's  
517 genome need to be converted to representative genome coordinates. To do so, we made  
518 whole genome (core) alignments of the representative genome to both versions of the strain  
519 genome (one with and one without SNPs introduced *in silico*) using nucmer and dnadiff,  
520 components of MUMmer v4.0.0beta2 [41], with default parameters (illustrated in Figure 1).  
521 For one-to-one alignment blocks, differences between each pair of genomes were identified  
522 using MUMmer show-snps with parameters -Clr -x 1, with the tabular output of this program  
523 converted to VCF by the script MUMmerSNPs2VCF.py  
524 (<https://github.com/liangjiaoxue/PythonNGSTools>, accessed 16<sup>th</sup> August 2018). The two  
525 resulting VCFs contain the location of all SNPs relative to the representative genome (i.e.  
526 inclusive of those introduced *in silico*), and all inter-strain variants, respectively. We  
527 excluded from further analysis two strains with poor-quality strain-to-representative whole  
528 genome alignments, both calling < 10% of the strain-specific *in silico* SNPs (Supplementary  
529 Table 11). The proportion of *in silico* SNPs recovered by whole genome alignment is detailed  
530 in Supplementary Table 11 and is, in general, high: of the 254 whole genome alignments of  
531 non-representative to representative strains across the 10 species, 222 detect > 80% of the *in*  
532 *silico* SNPs and 83 detect > 90%. For the purposes of evaluating SNP calling pipelines when  
533 the reference genome differs from the reads, we are concerned only with calling the truth set  
534 of *in silico* SNPs and so discard inter-strain variants (see below). More formally, when using  
535 each pipeline to align reads to a divergent genome, we are assessing the concordance of its  
536 set of SNP calls with the set of nucmer calls. However, it is possible that for a given call, one  
537 or more of the pipelines are correct and nucmer is incorrect. To reduce this possibility, a  
538 parallel set of whole genome alignments were made using Parsnp v1.2 with default  
539 parameters [42], with the exported SNPs contrasted with the nucmer VCF.

540



541 Thus, when aligning to a divergent genome, the truth set of *in silico* SNPs (for which each  
542 pipeline is scored for true positives) are those calls independently identified by both nucmer  
543 and Parsnp. Similarly, the set of inter-strain positions are those calls made by one or both of  
544 nucmer and Parsnp. As we are not concerned with the correctness of these calls, the lack of  
545 agreement between the two tools is not considered further; rather, this establishes a set of  
546 ambiguous positions which are discarded when VCFs are parsed.

547

548 Simulated SNP-containing genomes, sets of strain-to-representative genome SNP calls (made  
549 by both nucmer and Parsnp), and the final truth sets of SNPs are available in Supplementary  
550 Dataset 1 (hosted online via the Oxford Research Archive at  
551 <http://dx.doi.org/10.5287/bodleian:AmNXrjYN8>).

552

### 553 *Evaluating SNP calling pipelines using simulated data*

554 From each of 254 SNP-containing genomes, 3 sets of 150bp and 3 sets of 300bp paired-end  
555 were simulated using wgsim, a component of SAMtools v1.7 [21]. This requires an estimate  
556 of average insert size (the length of DNA between the adapter sequences), which in real data  
557 is often variable, being sensitive to the concentration of DNA used [88]. For read length  $x$ , we  
558 assumed an insert size of  $2.2x$ , i.e. for 300bp reads, the insert size is 660bp (Illumina paired-  
559 end reads typically have an insert longer than the combined length of both reads [89]). The  
560 number of reads simulated from each genome is detailed in Supplementary Table 3 and is  
561 equivalent to a mean 50-fold base-level coverage, i.e.  $(50 \times \text{genome length})/\text{read length}$ .

562

563 Perfect (error-free) reads were simulated from each SNP-containing genome using wgsim  
564 parameters `-e 0 -r 0 -R 0 -X 0 -A 0` (respectively, the sequencing error rate, mutation rate,  
565 fraction of indels, probability an indel is extended, and the fraction of ambiguous bases  
566 allowed).

567

568 Each set of reads was then aligned both to the genome of the same strain and to the  
569 representative genome of that species (from which the strain will diverge), with SNPs called  
570 using 41 different SNP calling pipelines (10 callers each paired with 4 aligners, plus the self-  
571 contained Snippy). The programs used, including version numbers and sources, are detailed  
572 in Supplementary Table 1, with associated command lines in Supplementary Text 1. All  
573 pipelines were run using a high-performance cluster employing the Open Grid Scheduler  
574 batch system on Scientific Linux 7. No formal assessment was made of pipeline run time or

575 memory usage. This was because given the number of simulations it was not tractable to  
576 benchmark run time using, for instance, a single core. The majority of programs in this study  
577 permit multithreading (all except the callers 16GT, GATK, Platypus, SNVer, and  
578 SNVSniffer) and so are in principle capable of running very rapidly. We did not seek to  
579 optimise each tool for any given species and so made only a minimum effort application of  
580 each pipeline, using default parameters and minimal VCF filtering (see below). This is so that  
581 we obtain the maximum possible number of true positives from each pipeline under  
582 reasonable use conditions.

583

584 While each pipeline comprises one aligner and one caller, there are several ancillary steps  
585 common in all cases. After aligning reads to each reference genome, all BAM files were  
586 cleaned, sorted, had duplicate reads marked and were indexed using Picard Tools v2.17.11  
587 [90] CleanSam, SortSam, MarkDuplicates and BuildBamIndex, respectively. We did not add  
588 a post-processing step of local indel realignment (common in older evaluations, e.g., [12]) as  
589 this had negligible effect upon pipeline performance, with many variant callers (including  
590 GATK HaplotypeCaller and Freebayes) already incorporating a method of haplotype  
591 assembly (see Supplementary Text 1).

592

593 Each pipeline produces a VCF as its final output. As with a previous evaluation [26], all  
594 VCFs were regularised using the `vcfallelicprimitives` module of `vcflib` v1.0.0-rc2  
595 (<https://github.com/ekg/vcflib>), so that different representations of the same indel or complex  
596 variant were not counted separately (these variants can otherwise be presented correctly in  
597 multiple ways). This module splits adjacent SNPs into individual SNPs, left-aligns indels and  
598 regularizes the representation of complex variants.

599

600 Different variant callers populate their output VCFs with different contextual information.  
601 Before evaluating the performance of each pipeline, all regularised VCFs were subject to  
602 minimal parsing to retain only high-confidence variants. This is because many tools record  
603 variant sites even if they have a low probability of variation, under the reasonable expectation  
604 of parsing. Some pipelines (notably Snippy) apply their own internal set of VCF filtering  
605 criteria, giving the user the option of a ‘raw’ or ‘filtered’ VCF; in such cases, we retain the  
606 filtered VCF as the default recommendation. Where possible, (additional) filter criteria were  
607 applied as previously used by, and empirically selected for, COMPASS (Complete Pathogen  
608 Sequencing Solution; <https://github.com/oxfordmmm/CompassCompact>), an analytic

609 pipeline employing Stampy and mpileup for base calling non-repetitive core genome sites  
610 (outlined in Supplementary Text 1 with filter criteria described in [91] and broadly similar to  
611 those recommended by a previous study for maximising SNP validation rate [92]). No set of  
612 generic VCF hard filters can be uniformly applied because each caller quantifies different  
613 metrics (such as the number of forward and reverse reads supporting a given call) and/or  
614 reports the outcome of a different set of statistical tests, making filtering suggestions on this  
615 basis. For instance, in particular circumstances, GATK suggests filtering on the basis of the  
616 fields ‘FS’, ‘MQRankSum’ and ‘ReadPosRankSum’, which are unique to it (detailed at  
617 <https://software.broadinstitute.org/gatk/documentation/article.php?id=6925>, accessed 2<sup>nd</sup>  
618 April 2019). Where the relevant information was included in the VCF, SNPs were required to  
619 have (a) a minimum Phred score of 20, (b) > 5 reads mapped at that position, (c) at least one  
620 read in each direction in support of the variant, and (d) >75% of reads supporting the  
621 alternative allele. These criteria were implemented with the ‘filter’ module of BCFtools v1.7  
622 [21] using parameters detailed in Supplementary Table 12.

623

624 From these filtered VCFs, evaluation metrics were calculated as detailed below.

625

### 626 ***Evaluating SNP calling pipelines using real sequencing data***

627 Parallel sets of 150 bp Illumina HiSeq 4000 paired-end short reads and ONT long reads were  
628 obtained from 16 environmentally-sourced samples from the REHAB project (‘the  
629 environmental REsistome: confluence of Human and Animal Biota in antibiotic resistance  
630 spread’; <http://modmedmicro.nsms.ox.ac.uk/rehab/>), as detailed in [46]: 4 *Enterobacter* spp.,  
631 4 *Klebsiella* spp., 4 *Citrobacter* spp., and 4 *Escherichia coli*, with species identified using  
632 MALDI-TOF (matrix-assisted laser desorption ionization time-of-flight) mass spectrometry,  
633 plus sub-cultures of stocks of two reference strains *K. pneumoniae* subsp. *pneumoniae* MGH  
634 78578 and *E. coli* CFT073. Additional predictions were made using both the protein- and  
635 nucleotide-level classification tools Kaiju v1.6.1 [69] and Kraken2 v2.0.7 [93], respectively.  
636 Kaiju was used with two databases, one broad and one deep, both created on 5<sup>th</sup> February  
637 2019: ‘P’ ([http://kaiju.binf.ku.dk/database/kaiju\\_db\\_progenomes\\_2019-02-05.tgz](http://kaiju.binf.ku.dk/database/kaiju_db_progenomes_2019-02-05.tgz); > 20  
638 million bacterial and archaeal genomes from the compact, manually curated, EMBL  
639 proGenomes [94], supplemented by approximately 10,000 viral genomes from NCBI RefSeq  
640 [95]) and ‘E’ ([http://kaiju.binf.ku.dk/database/kaiju\\_db\\_nr\\_euk\\_2019-02-05.tgz](http://kaiju.binf.ku.dk/database/kaiju_db_nr_euk_2019-02-05.tgz); > 100  
641 million bacterial, archaeal, viral and fungal genomes from NCBI nr, alongside various  
642 microbial eukaryotic taxa). Kaiju was run with parameters -e 5 and -E 0.05 which,

643 respectively, allow 5 mismatches per read and filter results on the basis of an E-value  
644 threshold of 0.05. The read classifications from both databases were integrated using the  
645 Kaiju ‘mergeOutputs’ module, which adjudicates based on the lowest taxonomic rank of each  
646 pair of classifications, provided they are within the same lineage, else re-classifies the read at  
647 the lowest common taxonomic rank ancestral to the two. Kraken2 was run with default  
648 parameters using the MiniKraken2 v1 database  
649 ([https://ccb.jhu.edu/software/kraken2/dl/minikraken2\\_v1\\_8GB.tgz](https://ccb.jhu.edu/software/kraken2/dl/minikraken2_v1_8GB.tgz), created 12<sup>th</sup> October  
650 2018), which was built from the complete set of NCBI RefSeq bacterial, archaeal and viral  
651 genomes.

652

653 Hybrid assemblies were produced using methods detailed in [46] and briefly recapitulated  
654 here. Illumina reads were processed using COMPASS (see above). ONT reads were adapter-  
655 trimmed using Porechop v0.2.2 (<https://github.com/rrwick/Porechop>) with default  
656 parameters, and then error-corrected and sub-sampled (preferentially selecting the longest  
657 reads) to 30-40x coverage using Canu v1.5 [96] with default parameters. Finally, Illumina-  
658 ONT hybrid assemblies for each genome were generated using Unicycler v0.4.0 [39] with  
659 default parameters. The original study found high agreement between these assemblies and  
660 those produced using hybrid assembly with PacBio long reads rather than ONT, giving us  
661 high confidence in their robustness.

662

663 In the simulated datasets, SNPs are introduced *in silico* into a genome, with reads containing  
664 these SNPs then simulated from it. With this dataset, however, there are no SNPs within each  
665 genome: we have only the short reads (that is, real output from an Illumina sequencer) and  
666 the genome assembled from them (with which there is an expectation of near-perfect read  
667 mapping).

668

669 To evaluate pipeline performance when the reads are aligned to a divergent genome,  
670 reference genomes were selected as representative of the predicted species, with distances  
671 between the two calculated using Mash v2.1 [43] and spanning approximately equal intervals  
672 from 0.01 to 0.12 (representative genomes and Mash distances are detailed in Supplementary  
673 Table 8). The truth set of SNPs between the representative genome and each hybrid assembly  
674 was the intersection of nucmer and Parsnp calls, as above.

675

676 Samples, source locations, MALDI ID scores and associated species predictions are detailed  
677 in Supplementary Table 8. Raw sequencing data and assemblies have been deposited with the  
678 NCBI under BioProject accession PRJNA42251  
679 (<https://www.ncbi.nlm.nih.gov/bioproject/PRJNA422511>).

680

### 681 ***Evaluation metrics***

682 For each pipeline, we calculated the absolute number of true positive (TP; the variant is in the  
683 simulated genome and correctly called by the pipeline), false positive (FP; the pipeline calls a  
684 variant which is not in the simulated genome) and false negative SNP calls (FN; the variant is  
685 in the simulated genome but the pipeline does not call it). We did not calculate true negative  
686 calls for two reasons. Firstly, to do so requires a VCF containing calls for all sites, a function  
687 offered by some variant callers (such as mpileup) but not all. Secondly, when aligning reads  
688 to a divergent genome, a disproportionately large number of reference sites will be excluded,  
689 particularly in more diverse species (for example, gene numbers in *N. gonorrhoeae* differ by  
690 up to a third; see Supplementary Table 5).

691

692 We then calculated the precision (positive predictive value) of each pipeline as  $TP/(TP+FP)$ ,  
693 recall (sensitivity) as  $TP/(TP+FN)$ , miss rate as  $FN/(TP+FN)$ , and total number of errors  
694  $(FP+FN)$  per million sequenced bases. We did not calculate specificity as this depends on  
695 true negative calls. We also calculated the F-score (as in [40]), which considers precision and  
696 recall with equal weight:  $F = 2 * ((precision * recall) / (precision + recall))$ . The F-score  
697 evaluates each pipeline as a single value bounded between 0 and 1 (perfect precision and  
698 recall). We also ranked each pipeline based on each metric so that – for example – the  
699 pipeline with the highest F-score, and the pipeline with the lowest number of false positives,  
700 would be rank 1 in their respective distributions. As an additional ‘overall performance’  
701 measure, we calculated the sum of ranks for the 7 core evaluation metrics (the absolute  
702 numbers of TP, FP and FN calls, and the proportion-based precision, recall, F-score, and total  
703 error rate per million sequenced bases). Pipelines with a lower sum of ranks would, in  
704 general, have higher overall performance.

705

706 We note that when SNPs are called after aligning reads from one strain to that of a divergent  
707 strain, the SNP calling pipeline will call positions for both the truth set of strain-specific *in*  
708 *silico* SNPs and any inter-strain variants. To allow a comparable evaluation of pipelines in  
709 this circumstance, inter-strain calls (obtained using nucmer and Parsnp; see above) are

710 discarded and not explicitly considered either true positive, false positive or false negative.  
711 While the set of true SNPs when aligning to a divergent strain will be smaller than that when  
712 aligned to the same strain (because all SNPs are simulated in genic regions but not all genes  
713 are shared between strains), this will not affect proportion-based evaluation metrics, such as  
714 F-score.

715

### 716 ***Effect size of differences in the F-score distribution between pipelines***

717 Differences between distributions are assessed by Mann Whitney U tests, with results  
718 interpreted using the non-parametric effect size estimator Cliff's delta [44, 45], estimated at a  
719 confidence level of 95% using the R package *effsize* v0.7.1 [97]. Cliff's delta employs the  
720 concept of dominance (which refers to the degree of overlap between distributions) and so is  
721 more robust when distributions are skewed. Estimates of delta are bound in the interval (-  
722 1,1), with extreme values indicating a lack of overlap between groups (respectively, set 1 <<  
723 set 2 and set 1 >> set 2). Distributions with  $|\text{delta}| < 0.147$  are negligibly different, as in [98].  
724 Conversely, distributions with  $|\text{delta}| \geq 0.60$  are considered to have large differences.

725

## 726 **Tables**

727

728 **Table 1.** Summary of pipeline performance across all species' genomes.

729

730 **Table 2.** Overall performance of each pipeline per species, calculated as the sum of seven  
731 ranks, when reads are aligned to a divergent genome.

732 The seven performance measures for each pipeline (the absolute numbers of true positive,  
733 false positive and false negative calls, and the proportion-based precision, recall, F-score, and  
734 total error rate per million sequenced bases) are detailed in Supplementary Table 6, with  
735 associated ranks in Supplementary Table 7.

736

## 737 **Figures**

738

739 **Figure 1. Overview of SNP calling evaluation.**

740 SNPs were introduced *in silico* into 254 closed bacterial genomes (Supplementary Table 2)  
741 using Simulome. Reads were then simulated from these genomes. 41 SNP calling pipelines  
742 (Supplementary Table 1) were evaluated using two different genomes for read alignment: the  
743 original genome from which the reads were simulated and a divergent genome, the species-

744 representative NCBI ‘reference genome’. In the latter case, it will not be possible to recover  
745 all of the original *in silico* SNPs as some will be found only within genes unique to the  
746 original genome. Accordingly, to evaluate SNP calls, the coordinates of the original genome  
747 need to be converted to those of the representative genome. To do so, whole genome  
748 alignments were made using both nucmer and Parsnp, with consensus calls identified within  
749 one-to-one alignment blocks. Inter-strain SNPs (those not introduced *in silico*) are excluded.  
750 The remaining subset of *in silico* calls comprise the truth set for evaluation. There is a strong  
751 correlation between the total number of SNPs introduced *in silico* into the original genome  
752 and the total number of nucmer/Parsnp consensus SNPs in the divergent genome  
753 (Supplementary Figure 3).

754

755 **Figure 2. Median F-score per pipeline when the reference genome for alignment is (A)**  
756 **the same as the source of the reads, and (B) a representative genome for that species.**

757 Panels show the median F-score of 41 different pipelines when SNPs are called using error-  
758 free 150bp and 300bp reads simulated from 254 genomes (of 10 species) at 50-fold coverage.  
759 Pipelines are ordered according to median F-score and coloured according to either the  
760 variant caller (A) or aligner (B) in each pipeline. Note that because F-scores are uniformly >  
761 0.9 when the reference genome for alignment is the same as the source of the reads, the  
762 vertical axes on each panel have different scales. Genomes are detailed in Supplementary  
763 Table 2, summary statistics for each pipeline in Supplementary Tables 3 and 6, and  
764 performance ranks in Supplementary Tables 4 and 7, for alignments to the same or to a  
765 representative genome, respectively.

766

767 **Figure 3. Reduced performance of SNP calling pipelines with increasing genetic**  
768 **distance between the reads and the reference genome.**

769 Panel A shows that the median F-score across the complete set of 41 pipelines, per strain,  
770 decreases as the distance between the strain and the reference genome increases (assayed as  
771 the Mash distance, which is based on the proportion of k-mers shared between genomes).  
772 Each point indicates the median F-score, across all pipelines, for the genome of one strain per  
773 species (n = 254 strains). Points are coloured by the species of each strain (n = 10 species).  
774 Panel B shows the median F-score per pipeline per strain, with points coloured according to  
775 the variant caller in each pipeline. This shows that the performance of some SNP calling  
776 pipelines is more negatively affected by increasing distance from the reference genome.

777 Summary statistics for each pipeline are shown in Supplementary Table 6, performance ranks  
778 in Supplementary Table 7 and the genetic distance between strains in Supplementary Table 2.  
779 Quantitatively similar results are seen if assaying distance as the total number of SNPs  
780 between the strain and representative genome, i.e. the set of strain-specific *in silico* SNPs  
781 plus inter-strain SNPs (Supplementary Figure 1).

782

783 **Figure 4. Stability of pipeline performance, in terms of F-score, with increasing genetic**  
784 **distance between the reads and the reference genome.**

785 The performance of a SNP calling pipeline decreases with increasing distance between the  
786 genome from which reads are sequenced and the reference genome to which they are aligned.  
787 Each point shows the median difference in F-score for a pipeline that calls SNPs when the  
788 reference genome is the same as the source of the reads, and when it is instead a  
789 representative genome for that species. Points are coloured according to the variant caller in  
790 each pipeline, with those towards the top of the figure less affected by distance. Lines fitted  
791 using LOESS smoothing.

792

793 **Figure 5. Head-to-head performance comparison of three pipelines, on the basis of**  
794 **precision, recall and F-score.**

795 This figure directly compares the performance of three pipelines using simulated data:  
796 Snippy, Novoalign/mpileup and BWA/mpileup. Each point indicates the median F-score,  
797 precision or recall (columns 1 through 3, respectively), for the genome of one strain per  
798 species (n = 254 strains). Raw data for this figure is given in Supplementary Table 6. Text in  
799 the top left of each figure is an interpretation of the difference between each pair of  
800 distributions, obtained using the R package ‘effsize’ which applies the non-parametric effect  
801 size estimator Cliff’s delta to the results of a Mann Whitney U test. An expanded version of  
802 this figure, comparing 40 pipelines relative to Snippy, is given as Supplementary Figure 4.

803

804 **Figure 6. Similarity of performance for pipelines evaluated using both simulated and**  
805 **real sequencing data.**

806 Panel A shows that pipelines evaluated using real sequencing data show reduced performance  
807 with increasing Mash distances between the reads and the reference genome, similar to that  
808 observed with simulated data (see Figure 3A). Each point indicates the median F-score,  
809 across all pipelines, for the genome of an environmentally-sourced/reference isolate (detailed  
810 in Supplementary Table 8). Panel B shows that pipelines evaluated using real and simulated



811 sequencing data have comparable accuracy. Each point shows the median precision of each  
812 of 41 pipelines, calculated across both a divergent set of 254 simulated genomes (2-36 strains  
813 from ten clinically common species) and 18 real genomes (isolates of *Citrobacter*,  
814 *Enterobacter*, *Escherichia* and *Klebsiella*). The outlier pipeline, with lowest precision on both  
815 real and simulated data, is Stampy/Freebayes. Raw data for this figure are available in  
816 Supplementary Tables 6 (simulated genomes) and 9 (real genomes).

817

## 818 **Supplementary Tables**

819

820 **Supplementary Table 1.** Sources of software.

821

822 **Supplementary Table 2.** Genomes into which SNPs were introduced *in silico*, and various  
823 measures of distance between each strain's genome and the representative genome of that  
824 species.

825

826 **Supplementary Table 3.** Summary statistics of SNP calling pipelines after aligning reads to  
827 the same reference genome as their origin.

828

829 **Supplementary Table 4.** Ranked performance of SNP calling pipelines after aligning reads  
830 to the same reference genome as their origin.

831

832 **Supplementary Table 5.** Genome size diversity within 5 clinically common bacterial  
833 species.

834

835 **Supplementary Table 6.** Summary statistics of SNP calling pipelines after aligning reads to  
836 a reference genome differing from their origin.

837

838 **Supplementary Table 7.** Ranked performance of SNP calling pipelines after aligning reads  
839 to reference genome differing from their origin.

840

841 **Supplementary Table 8.** Environmentally-sourced/reference Gram-negative isolates and  
842 associated representative genomes.

843

844 **Supplementary Table 9.** Summary statistics of SNP calling pipelines after aligning real  
845 reads to a reference genome differing from their origin.

846

847 **Supplementary Table 10.** Ranked performance of SNP calling pipelines after aligning real  
848 reads to reference genome differing from their origin.

849

850 **Supplementary Table 11.** Proportion of strain-specific *in silico* SNPs detected in whole  
851 genome alignments between the strain genome and a representative genome.

852

853 **Supplementary Table 12.** VCF filtering parameters, as used by BCFtools.

854

855 **Supplementary Table 13.** Summary statistics of SNP calling pipelines after aligning both  
856 error-free and error-containing reads to the same reference genome as their origin.

857

858 **Supplementary Table 14.** Summary statistics of SNP calling pipelines after aligning both  
859 error-free and error-containing reads to a reference genome differing from their origin.

860

861 **Supplementary Table 15.** Summary statistics of SNP calling pipelines after aligning error-  
862 free reads to a reference genome differing from their origin, both with and without local indel  
863 realignment.

864

### 865 **Supplementary Figures**

866

867 **Supplementary Figure 1. Reduced performance of SNP calling pipelines with increasing**  
868 **genetic distance between the reads and the reference genome (assayed as total number**  
869 **of SNPs).**

870 The median F-score across a set of 41 pipelines, per strain, decreases as the distance between  
871 the strain and the reference genome increases (assayed as the total number of SNPs between  
872 the strain and representative genome, i.e. the set of strain-specific *in silico* SNPs plus inter-  
873 strain SNPs). Each point indicates the genome of one strain per species (n = 254 strains).

874 Points are coloured by the species of each strain (n = 10 species). Summary statistics for each  
875 pipeline are shown in Supplementary Table 6, performance ranks in Supplementary Table 7  
876 and the genetic distance between strains in Supplementary Table 2. Quantitatively similar

877 results are seen if assaying distance as the Mash distance, which is based on the proportion of  
878 k-mers shared between genomes (Figure 3A).

879

880 **Supplementary Figure 2. Decreasing sensitivity (that is, an increased number of false**  
881 **negative calls) with increasing genetic distance between the reads and the reference**  
882 **genome (assayed as Mash distance).**

883 The median sensitivity (recall) across a set of 41 pipelines, per strain, increases as the  
884 distance between the strain and the reference genome increases (assayed as the Mash  
885 distance, which is based on the proportion of shared k-mers between genomes). Each point  
886 indicates the genome of one strain per species (n = 254 strains). Points are coloured by the  
887 species of each strain (n = 10 species). Summary statistics for each pipeline are shown in  
888 Supplementary Table 6, performance ranks in Supplementary Table 7 and the genetic  
889 distance between strains in Supplementary Table 2.

890

891 **Supplementary Figure 3. Total number of SNPs it is possible to call should reads from**  
892 **one strain be aligned to a representative genome of that species.**

893 Strong correlation between the total number of SNPs introduced *in silico* into one genome  
894 and the maximum number of SNPs it is possible to call assuming reads from the former are  
895 aligned to a representative genome of that species (which will not necessarily contain the  
896 same complement of genes). Each point represents the genome of one strain, with genomes  
897 detailed in Supplementary Table 2. The line  $y = x$  is shown in red.

898

899 **Supplementary Figure 4. Head-to-head performance comparison of all pipelines relative**  
900 **to Snippy, on the basis of F-score.**

901 This figure directly compares the performance, using simulated data, of 40 pipelines relative  
902 to Snippy. Each point indicates the median F-score for the genome of one strain per species  
903 (n = 254 strains). Data for Snippy is plotted on the x-axis, and for the named pipeline on the  
904 y-axis. Raw data for this figure is given in Supplementary Table 6. Text in the top left of each  
905 figure is an interpretation of the difference between each pair of distributions, obtained using  
906 the R package 'effsize' which applies the non-parametric effect size estimator Cliff's delta to  
907 the results of a Mann Whitney U test.

908

909 **Supplementary Figure 5. Selection of *E. coli* isolates by manual review of dendrogram**  
910 **topology.**

911 There are numerous usable complete genomes for *E. coli*. For the SNP calling evaluation, a  
912 subset of isolates was selected (indicated in red boxes) so as to maximise the diversity of  
913 clades represented. To do so, an all-against-all distance matrix for each genome was created  
914 using the ‘triangle’ component of Mash v2.1, with a dendrogram constructed using the  
915 neighbour joining method implemented in MEGA v7.0.14. Sources for the selected genomes  
916 are given in Supplementary Table 2.

917

918 **Supplementary Figure 6. Selection of *K. pneumoniae* isolates by manual review of**  
919 **dendrogram topology.**

920 There are numerous usable complete genomes for *K. pneumoniae*. For the SNP calling  
921 evaluation, a subset of isolates was selected (indicated in red boxes) so as to maximise the  
922 diversity of clades represented. To do so, an all-against-all distance matrix for each genome  
923 was created using the ‘triangle’ component of Mash v2.1, with a dendrogram constructed  
924 using the neighbour joining method implemented in MEGA v7.0.14. Sources for the selected  
925 genomes are given in Supplementary Table 2.

926

927 **Supplementary Figure 7. Selection of *L. monocytogenes* isolates by manual review of**  
928 **dendrogram topology.**

929 There are numerous usable complete genomes for *L. monocytogenes*. For the SNP calling  
930 evaluation, a subset of isolates was selected (indicated in red boxes) so as to maximise the  
931 diversity of clades represented. To do so, an all-against-all distance matrix for each genome  
932 was created using the ‘triangle’ component of Mash v2.1, with a dendrogram constructed  
933 using the neighbour joining method implemented in MEGA v7.0.14. Sources for the selected  
934 genomes are given in Supplementary Table 2.

935

936 **Supplementary Figure 8. Selection of *S. enterica* isolates by manual review of**  
937 **dendrogram topology.**

938 There are numerous usable complete genomes for *S. enterica*. For the SNP calling evaluation,  
939 a subset of isolates was selected (indicated in red boxes) so as to maximise the diversity of  
940 clades represented. To do so, an all-against-all distance matrix for each genome was created  
941 using the ‘triangle’ component of Mash v2.1, with a dendrogram constructed using the  
942 neighbour joining method implemented in MEGA v7.0.14. Sources for the selected genomes  
943 are given in Supplementary Table 2.

944

945 **Supplementary Figure 9. Selection of *S. aureus* isolates by manual review of**  
946 **dendrogram topology.**

947 There are numerous usable complete genomes for *S. aureus*. For the SNP calling evaluation,  
948 a subset of isolates was selected (indicated in red boxes) so as to maximise the diversity of  
949 clades represented. To do so, an all-against-all distance matrix for each genome was created  
950 using the ‘triangle’ component of Mash v2.1, with a dendrogram constructed using the  
951 neighbour joining method implemented in MEGA v7.0.14. Sources for the selected genomes  
952 are given in Supplementary Table 2.

953

954 **Supplementary Datasets**

955

956 **Supplementary Dataset 1. Simulated datasets for evaluating bacterial SNP calling**  
957 **pipelines.**

958 This archive contains the set of 254 SNP-containing genomes, VCFs containing the nucmer  
959 and Parsnp strain-to-representative genome SNP calls, and the final truth sets of SNPs used  
960 for evaluation.

961

962 **Declarations**

963

964 **Ethics approval and consent to participate**

965 Not applicable.

966

967 **Consent for publication**

968 Not applicable.

969

970 **Availability of data and material**

971 All data analysed during this study are included in this published article and its  
972 supplementary information files. The simulated datasets generated during this study –  
973 comprising the SNP-containing genomes, log files of the SNPs introduced into each genome,  
974 and VCFs of strain-to-representative genome SNP calls – are available in Supplementary  
975 Dataset 1 (hosted online via the Oxford Research Archive at  
976 <http://dx.doi.org/10.5287/bodleian:AmNXrjYN8>). Raw sequencing data and assemblies from  
977 the REHAB project, described in [46], are available in the NCBI under BioProject accession  
978 PRJNA42251 (<https://www.ncbi.nlm.nih.gov/bioproject/PRJNA422511>).

979

## 980 **Competing interests**

981 The authors declare that they have no competing interests.

982

## 983 **Funding**

984 This study was funded by the National Institute for Health Research Health Protection  
985 Research Unit (NIHR HPRU) in Healthcare Associated Infections and Antimicrobial  
986 Resistance at Oxford University in partnership with Public Health England (PHE) [grant  
987 HPRU-2012-10041]. DF, DWC, TEAP and ASW are supported by the NIHR Biomedical  
988 Research Centre. Computation used the Oxford Biomedical Research Computing (BMRC)  
989 facility, a joint development between the Wellcome Centre for Human Genetics and the Big  
990 Data Institute supported by Health Data Research UK and the NIHR Oxford Biomedical  
991 Research Centre. The report presents independent research funded by the National Institute  
992 for Health Research. The views expressed in this publication are those of the author and not  
993 necessarily those of the NHS, the National Institute for Health Research, the Department of  
994 Health or Public Health England. NS is funded by a University of Oxford/Public Health  
995 England Clinical Lectureship. LPS is funded by the Antimicrobial Resistance Cross Council  
996 Initiative supported by the seven research councils (NE/N019989/1). DWC, TEAP and ASW  
997 are NIHR Senior Investigators.

998 This work also made use of the Edinburgh Compute and Data Facility (ECDF) at the  
999 University of Edinburgh, supported in part by BBSRC Institute Strategic Program Grants  
1000 awarded to The Roslin Institute including ‘Control of Infectious Diseases’ (BB/P013740/1).

1001

## 1002 **Authors’ contributions**

1003 SJB conceived of and designed the study with support from DF, DWE, TEAP, DWC and  
1004 ASW. SJB performed all informatic analyses related to the SNP calling evaluation. ELC  
1005 contributed to the acquisition of data and computational resources. NDM, LPS and NS  
1006 generated and provided the reads and assemblies comprising the REHAB sequencing dataset.  
1007 LPS created Figure 1. SJB wrote the manuscript, with edits from all other authors.

1008 All authors read and approved the final manuscript.

1009

## 1010 **Acknowledgements**

1011 The authors would also like to thank the REHAB consortium, which currently includes  
1012 (bracketed individuals in the main author list): Abuoun M, Anjum M, Bailey MJ, Barker L,

1013 Brett H, Bowes MJ, Chau K, (Crook DW), (De Maio N), Gilson D, Gweon HS, Hubbard  
1014 ATM, Hoosdally S, Kavanagh J, Jones H, (Peto TEA), Read DS, Sebra R, (Shaw LP),  
1015 Sheppard AE, Smith R, (Stoesser N), Stubberfield E, Swann J, (Walker AS), Woodford N.  
1016

## 1017 **References**

- 1018  
1019 1. Taylor AJ, Lappi V, Wolfgang WJ, Lapierre P, Palumbo MJ, Medus C, et al.  
1020 Characterization of Foodborne Outbreaks of Salmonella enterica Serovar Enteritidis  
1021 with Whole-Genome Sequencing Single Nucleotide Polymorphism-Based Analysis  
1022 for Surveillance and Outbreak Detection. *Journal of clinical microbiology*. 2015;53  
1023 10:3334-40. doi:10.1128/jcm.01280-15.
- 1024 2. Hendriksen RS, Price LB, Schupp JM, Gillece JD, Kaas RS, Engelthaler DM, et al.  
1025 Population genetics of *Vibrio cholerae* from Nepal in 2010: evidence on the origin of  
1026 the Haitian outbreak. *mBio*. 2011;2 4:e00157-11. doi:10.1128/mBio.00157-11.
- 1027 3. Caspar SM, Dubacher N, Kopps AM, Meienberg J, Henggeler C and Matyas G.  
1028 Clinical sequencing: From raw data to diagnosis with lifetime value. *Clinical genetics*.  
1029 2018;93 3:508-19. doi:10.1111/cge.13190.
- 1030 4. Altmann A, Weber P, Bader D, Preuss M, Binder EB and Muller-Myhsok B. A  
1031 beginners guide to SNP calling from high-throughput DNA-sequencing data. *Human*  
1032 *genetics*. 2012;131 10:1541-54. doi:10.1007/s00439-012-1213-z.
- 1033 5. Reinert K, Langmead B, Weese D and Evers DJ. Alignment of Next-Generation  
1034 Sequencing Reads. *Annual review of genomics and human genetics*. 2015;16:133-51.  
1035 doi:10.1146/annurev-genom-090413-025358.
- 1036 6. Li H and Homer N. A survey of sequence alignment algorithms for next-generation  
1037 sequencing. *Brief Bioinform*. 2010;11 5:473-83. doi:10.1093/bib/bbq015.
- 1038 7. Mielczarek M and Szyda J. Review of alignment and SNP calling algorithms for next-  
1039 generation sequencing data. *Journal of Applied Genetics*. 2016;57 1:71-9.  
1040 doi:10.1007/s13353-015-0292-7.
- 1041 8. Hasan MS, Wu X and Zhang L. Performance evaluation of indel calling tools using  
1042 real short-read data. *Human Genomics*. 2015;9 1:20. doi:10.1186/s40246-015-0042-2.
- 1043 9. O'Rawe J, Jiang T, Sun G, Wu Y, Wang W, Hu J, et al. Low concordance of multiple  
1044 variant-calling pipelines: practical implications for exome and genome sequencing.  
1045 *Genome Medicine*. 2013;5 3:28. doi:10.1186/gm432.
- 1046 10. Alkan C, Coe BP and Eichler EE. Genome structural variation discovery and  
1047 genotyping. *Nature reviews Genetics*. 2011;12 5:363-76. doi:10.1038/nrg2958.
- 1048 11. Sandmann S, de Graaf AO, Karimi M, van der Reijden BA, Hellstrom-Lindberg E,  
1049 Jansen JH, et al. Evaluating Variant Calling Tools for Non-Matched Next-Generation  
1050 Sequencing Data. *Sci Rep*. 2017;7:43169. doi:10.1038/srep43169.
- 1051 12. Liu X, Han S, Wang Z, Gelernter J and Yang B-Z. Variant Callers for Next-  
1052 Generation Sequencing Data: A Comparison Study. *PLoS ONE*. 2013;8 9:e75619.  
1053 doi:10.1371/journal.pone.0075619.
- 1054 13. Li H. Toward better understanding of artifacts in variant calling from high-coverage  
1055 samples. *Bioinformatics*. 2014;30 20:2843-51. doi:10.1093/bioinformatics/btu356.
- 1056 14. Hwang S, Kim E, Lee I and Marcotte EM. Systematic comparison of variant calling  
1057 pipelines using gold standard personal exome variants. *Scientific Reports*.  
1058 2015;5:17875. doi:10.1038/srep17875.

- 1059 15. Cornish A and Guda C. A Comparison of Variant Calling Pipelines Using Genome in  
1060 a Bottle as a Reference. *BioMed Research International*. 2015;2015:11.  
1061 doi:10.1155/2015/456479.
- 1062 16. Smith HE and Yun S. Evaluating alignment and variant-calling software for mutation  
1063 identification in *C. elegans* by whole-genome sequencing. *PLoS ONE*. 2017;12  
1064 3:e0174446. doi:10.1371/journal.pone.0174446.
- 1065 17. Baes CF, Dolezal MA, Koltjes JE, Bapst B, Fritz-Waters E, Jansen S, et al. Evaluation  
1066 of variant identification methods for whole genome sequencing data in dairy cattle.  
1067 *BMC Genomics*. 2014;15 1:948. doi:10.1186/1471-2164-15-948.
- 1068 18. Mielczarek M and Szyda J. Review of alignment and SNP calling algorithms for next-  
1069 generation sequencing data. *Journal of applied genetics*. 2016;57 1:71-9.  
1070 doi:10.1007/s13353-015-0292-7.
- 1071 19. Eberle MA, Fritzilas E, Krusche P, Källberg M, Moore BL, Bekritsky MA, et al. A  
1072 reference data set of 5.4 million phased human variants validated by genetic  
1073 inheritance from sequencing a three-generation 17-member pedigree. *Genome*  
1074 *Research*. 2016; doi:10.1101/gr.210500.116.
- 1075 20. Kómár P and Kural D. geck: trio-based comparative benchmarking of variant calls.  
1076 *Bioinformatics*. 2018:bty415-bty. doi:10.1093/bioinformatics/bty415.
- 1077 21. Li H, Handsaker B, Wysoker A, Fennell T, Ruan J, Homer N, et al. The Sequence  
1078 Alignment/Map format and SAMtools. *Bioinformatics*. 2009;25 16:2078-9.  
1079 doi:10.1093/bioinformatics/btp352.
- 1080 22. Pightling AW, Petronella N and Pagotto F. Choice of Reference Sequence and  
1081 Assembler for Alignment of *Listeria monocytogenes* Short-Read Sequence Data  
1082 Greatly Influences Rates of Error in SNP Analyses. *PLoS ONE*. 2014;9 8:e104579.  
1083 doi:10.1371/journal.pone.0104579.
- 1084 23. Li H and Durbin R. Fast and accurate short read alignment with Burrows–Wheeler  
1085 transform. *Bioinformatics*. 2009;25 14:1754-60. doi:10.1093/bioinformatics/btp324.
- 1086 24. DePristo MA, Banks E, Poplin RE, Garimella KV, Maguire JR, Hartl C, et al. A  
1087 framework for variation discovery and genotyping using next-generation DNA  
1088 sequencing data. *Nature genetics*. 2011;43 5:491-8. doi:10.1038/ng.806.
- 1089 25. McKenna A, Hanna M, Banks E, Sivachenko A, Cibulskis K, Kernytsky A, et al. The  
1090 Genome Analysis Toolkit: A MapReduce framework for analyzing next-generation  
1091 DNA sequencing data. *Genome Research*. 2010;20 9:1297-303.  
1092 doi:10.1101/gr.107524.110.
- 1093 26. Cornish A and Guda C. A Comparison of Variant Calling Pipelines Using Genome in  
1094 a Bottle as a Reference. *BioMed Research International*. 2015;2015:456479.  
1095 doi:10.1155/2015/456479.
- 1096 27. Li H. Minimap2: pairwise alignment for nucleotide sequences. *Bioinformatics*.  
1097 2018:bty191-bty. doi:10.1093/bioinformatics/bty191.
- 1098 28. Lunter G and Goodson M. Stampy: A statistical algorithm for sensitive and fast  
1099 mapping of Illumina sequence reads. *Genome Research*. 2011;21 6:936-9.  
1100 doi:10.1101/gr.111120.110.
- 1101 29. Luo R, Schatz MC and Salzberg SL. 16GT: a fast and sensitive variant caller using a  
1102 16-genotype probabilistic model. *GigaScience*. 2017;6 7:1-4.  
1103 doi:10.1093/gigascience/gix045.
- 1104 30. Garrison E and Marth G. Haplotype-based variant detection from short-read  
1105 sequencing. *arXiv*. 2012:arXiv:1207.3907 [q-bio.GN].
- 1106 31. Wilm A, Aw PPK, Bertrand D, Yeo GHT, Ong SH, Wong CH, et al. LoFreq: a  
1107 sequence-quality aware, ultra-sensitive variant caller for uncovering cell-population



- 1108 heterogeneity from high-throughput sequencing datasets. *Nucleic Acids Research*.  
1109 2012;40 22:11189-201. doi:10.1093/nar/gks918.
- 1110 32. Rimmer A, Phan H, Mathieson I, Iqbal Z, Twigg SRF, Consortium WGS, et al.  
1111 Integrating mapping-, assembly- and haplotype-based approaches for calling variants  
1112 in clinical sequencing applications. *Nature Genetics*. 2014;46:912.  
1113 doi:10.1038/ng.3036.
- 1114 33. Wei Z, Wang W, Hu P, Lyon GJ and Hakonarson H. SNVer: a statistical tool for  
1115 variant calling in analysis of pooled or individual next-generation sequencing data.  
1116 *Nucleic Acids Res*. 2011;39 19:e132. doi:10.1093/nar/gkr599.
- 1117 34. Liu Y, Loewer M, Aluru S and Schmidt B. SNVSniffer: an integrated caller for  
1118 germline and somatic single-nucleotide and indel mutations. *BMC Systems Biology*.  
1119 2016;10 2:47. doi:10.1186/s12918-016-0300-5.
- 1120 35. Saunders CT, Wong WS, Swamy S, Becq J, Murray LJ and Cheetham RK. Strelka:  
1121 accurate somatic small-variant calling from sequenced tumor-normal sample pairs.  
1122 *Bioinformatics*. 2012;28 14:1811-7. doi:10.1093/bioinformatics/bts271.
- 1123 36. Koboldt DC, Chen K, Wylie T, Larson DE, McLellan MD, Mardis ER, et al.  
1124 VarScan: variant detection in massively parallel sequencing of individual and pooled  
1125 samples. *Bioinformatics*. 2009;25 17:2283-5. doi:10.1093/bioinformatics/btp373.
- 1126 37. Lawson PA, Citron DM, Tyrrell KL and Finegold SM. Reclassification of  
1127 *Clostridium difficile* as *Clostridioides difficile* (Hall and O'Toole 1935) Prevot 1938.  
1128 *Anaerobe*. 2016;40:95-9. doi:10.1016/j.anaerobe.2016.06.008.
- 1129 38. Sebahia M, Wren BW, Mullany P, Fairweather NF, Minton N, Stabler R, et al. The  
1130 multidrug-resistant human pathogen *Clostridium difficile* has a highly mobile, mosaic  
1131 genome. *Nat Genet*. 2006;38 7:779-86. doi:10.1038/ng1830.
- 1132 39. Wick RR, Judd LM, Gorrie CL and Holt KE. Unicycler: Resolving bacterial genome  
1133 assemblies from short and long sequencing reads. *PLoS computational biology*.  
1134 2017;13 6:e1005595. doi:10.1371/journal.pcbi.1005595.
- 1135 40. Sandmann S, de Graaf AO, Karimi M, van der Reijden BA, Hellström-Lindberg E,  
1136 Jansen JH, et al. Evaluating Variant Calling Tools for Non-Matched Next-Generation  
1137 Sequencing Data. *Scientific Reports*. 2017;7:43169. doi:10.1038/srep43169.
- 1138 41. Marçais G, Delcher AL, Phillippy AM, Coston R, Salzberg SL and Zimin A.  
1139 MUMmer4: A fast and versatile genome alignment system. *PLoS Computational  
1140 Biology*. 2018;14 1:e1005944. doi:10.1371/journal.pcbi.1005944.
- 1141 42. Treangen TJ, Ondov BD, Koren S and Phillippy AM. The Harvest suite for rapid  
1142 core-genome alignment and visualization of thousands of intraspecific microbial  
1143 genomes. *Genome Biology*. 2014;15 11:524. doi:10.1186/s13059-014-0524-x.
- 1144 43. Ondov BD, Treangen TJ, Melsted P, Mallonee AB, Bergman NH, Koren S, et al.  
1145 Mash: fast genome and metagenome distance estimation using MinHash. *Genome  
1146 Biology*. 2016;17 1:132. doi:10.1186/s13059-016-0997-x.
- 1147 44. Cliff N. Dominance statistics: Ordinal analyses to answer ordinal questions.  
1148 *Psychological Bulletin*. 1993;114 3:494-509.
- 1149 45. Macbeth G, Razumiejczyk E and Ledesma RD. Cliff's delta calculator: a non-  
1150 parametric effect size program for two groups of observations. *Universitas  
1151 Psychologica*. 2011;10 2:545-55.
- 1152 46. De Maio N, Shaw LP, Hubbard A, George S, Sanderson N, Swann J, et al.  
1153 Comparison of long-read sequencing technologies in the hybrid assembly of complex  
1154 bacterial genomes. *bioRxiv*. 2019:530824. doi:10.1101/530824.
- 1155 47. Zook J, McDaniel J, Parikh H, Heaton H, Irvine SA, Trigg L, et al. Reproducible  
1156 integration of multiple sequencing datasets to form high-confidence SNP, indel, and  
1157 reference calls for five human genome reference materials. *bioRxiv*. 2018.

- 1158 48. Zook JM, Catoe D, McDaniel J, Vang L, Spies N, Sidow A, et al. Extensive  
1159 sequencing of seven human genomes to characterize benchmark reference materials.  
1160 Scientific Data. 2016;3:160025. doi:10.1038/sdata.2016.25.
- 1161 49. Zook JM and Salit M. Genomes in a bottle: creating standard reference materials for  
1162 genomic variation - why, what and how? Genome Biology. 2011;12 Suppl 1:P31-P.  
1163 doi:10.1186/gb-2011-12-s1-p31.
- 1164 50. Tian S, Yan H, Neuhauser C and Slager SL. An analytical workflow for accurate  
1165 variant discovery in highly divergent regions. BMC Genomics. 2016;17 1:703.  
1166 doi:10.1186/s12864-016-3045-z.
- 1167 51. van Eijk E, Anvar SY, Browne HP, Leung WY, Frank J, Schmitz AM, et al. Complete  
1168 genome sequence of the *Clostridium difficile* laboratory strain 630 $\Delta$ erm reveals  
1169 differences from strain 630, including translocation of the mobile element CTn5.  
1170 BMC Genomics. 2015;16 1:31. doi:10.1186/s12864-015-1252-7.
- 1171 52. Jordan PW, Snyder LA and Saunders NJ. Strain-specific differences in *Neisseria*  
1172 *gonorrhoeae* associated with the phase variable gene repertoire. BMC Microbiology.  
1173 2005;5 1:21. doi:10.1186/1471-2180-5-21.
- 1174 53. Hanage WP. Fuzzy species revisited. BMC Biology. 2013;11 1:41. doi:10.1186/1741-  
1175 7007-11-41.
- 1176 54. Hanage WP, Fraser C and Spratt BG. Fuzzy species among recombinogenic bacteria.  
1177 BMC biology. 2005;3:6-. doi:10.1186/1741-7007-3-6.
- 1178 55. Dos Vultos T, Mestre O, Rauzier J, Golec M, Rastogi N, Rasolofo V, et al. Evolution  
1179 and diversity of clonal bacteria: the paradigm of *Mycobacterium tuberculosis*. PLoS  
1180 One. 2008;3 2:e1538. doi:10.1371/journal.pone.0001538.
- 1181 56. Lee RS and Behr MA. Does Choice Matter? Reference-Based Alignment for  
1182 Molecular Epidemiology of Tuberculosis. Journal of clinical microbiology. 2016;54  
1183 7:1891-5. doi:10.1128/jcm.00364-16.
- 1184 57. Nadon CA, Woodward DL, Young C, Rodgers FG and Wiedmann M. Correlations  
1185 between molecular subtyping and serotyping of *Listeria monocytogenes*. Journal of  
1186 clinical microbiology. 2001;39 7:2704-7. doi:10.1128/jcm.39.7.2704-2707.2001.
- 1187 58. Rasmussen OF, Skouboe P, Dons L, Rossen L and Olsen JE. *Listeria monocytogenes*  
1188 exists in at least three evolutionary lines: evidence from flagellin, invasive associated  
1189 protein and listeriolysin O genes. Microbiology (Reading, England). 1995;141 ( Pt  
1190 9):2053-61. doi:10.1099/13500872-141-9-2053.
- 1191 59. Pirone-Davies C, Chen Y, Pightling A, Ryan G, Wang Y, Yao K, et al. Genes  
1192 significantly associated with lineage II food isolates of *Listeria monocytogenes*. BMC  
1193 Genomics. 2018;19 1:708. doi:10.1186/s12864-018-5074-2.
- 1194 60. Olson ND, Lund SP, Colman RE, Foster JT, Sahl JW, Schupp JM, et al. Best  
1195 practices for evaluating single nucleotide variant calling methods for microbial  
1196 genomics. Frontiers in Genetics. 2015;6:235. doi:10.3389/fgene.2015.00235.
- 1197 61. Price A and Gibas C. The quantitative impact of read mapping to non-native reference  
1198 genomes in comparative RNA-Seq studies. PLoS ONE. 2017;12 7:e0180904.  
1199 doi:10.1371/journal.pone.0180904.
- 1200 62. Walker BJ, Abeel T, Shea T, Priest M, Abouelliel A, Sakthikumar S, et al. Pilon: An  
1201 Integrated Tool for Comprehensive Microbial Variant Detection and Genome  
1202 Assembly Improvement. PLoS ONE. 2014;9 11:e112963.  
1203 doi:10.1371/journal.pone.0112963.
- 1204 63. Long Q, Rabanal FA, Meng D, Huber CD, Farlow A, Platzer A, et al. Massive  
1205 genomic variation and strong selection in *Arabidopsis thaliana* lines from Sweden.  
1206 Nature genetics. 2013;45 8:884-90. doi:10.1038/ng.2678.

- 1207 64. Ghoneim DH, Myers JR, Tuttle E and Paciorowski AR. Comparison of  
1208 insertion/deletion calling algorithms on human next-generation sequencing data.  
1209 BMC research notes. 2014;7 1:864. doi:10.1186/1756-0500-7-864.
- 1210 65. Farrer RA, Henk DA, MacLean D, Studholme DJ and Fisher MC. Using false  
1211 discovery rates to benchmark SNP-callers in next-generation sequencing projects. Sci  
1212 Rep. 2013;3:1512. doi:10.1038/srep01512.
- 1213 66. Liu Q, Guo Y, Li J, Long J, Zhang B and Shyr Y. Steps to ensure accuracy in  
1214 genotype and SNP calling from Illumina sequencing data. BMC Genomics. 2012;13  
1215 Suppl 8:S8. doi:10.1186/1471-2164-13-s8-s8.
- 1216 67. Glenn TC. Field guide to next-generation DNA sequencers. Molecular Ecology  
1217 Resources. 2011;11 5:759-69. doi:10.1111/j.1755-0998.2011.03024.x.
- 1218 68. Kim D, Song L, Breitwieser FP and Salzberg SL. Centrifuge: rapid and sensitive  
1219 classification of metagenomic sequences. Genome Res. 2016;26 12:1721-9.  
1220 doi:10.1101/gr.210641.116.
- 1221 69. Menzel P, Ng KL and Krogh A. Fast and sensitive taxonomic classification for  
1222 metagenomics with Kaiju. Nature communications. 2016;7:11257.  
1223 doi:10.1038/ncomms11257.
- 1224 70. Davis MP, van Dongen S, Abreu-Goodger C, Bartonicek N and Enright AJ. Kraken: a  
1225 set of tools for quality control and analysis of high-throughput sequence data.  
1226 Methods. 2013;63 1:41-9. doi:10.1016/j.ymeth.2013.06.027.
- 1227 71. Mende DR, Letunic I, Huerta-Cepas J, Li SS, Forslund K, Sunagawa S, et al.  
1228 proGenomes: a resource for consistent functional and taxonomic annotations of  
1229 prokaryotic genomes. Nucleic Acids Research. 2017;45 Database issue:D529-D34.  
1230 doi:10.1093/nar/gkw989.
- 1231 72. O'Leary NA, Wright MW, Brister JR, Ciufu S, Haddad D, McVeigh R, et al.  
1232 Reference sequence (RefSeq) database at NCBI: current status, taxonomic expansion,  
1233 and functional annotation. Nucleic Acids Research. 2016;44 Database issue:D733-  
1234 D45. doi:10.1093/nar/gkv1189.
- 1235 73. McIntyre ABR, Ounit R, Afshinnekoo E, Prill RJ, Hénaff E, Alexander N, et al.  
1236 Comprehensive benchmarking and ensemble approaches for metagenomic classifiers.  
1237 Genome Biology. 2017;18 1:182. doi:10.1186/s13059-017-1299-7.
- 1238 74. Lindgreen S, Adair KL and Gardner PP. An evaluation of the accuracy and speed of  
1239 metagenome analysis tools. Scientific Reports. 2016;6:19233. doi:10.1038/srep19233.
- 1240 75. Bradley P, Gordon NC, Walker TM, Dunn L, Heys S, Huang B, et al. Rapid  
1241 antibiotic-resistance predictions from genome sequence data for Staphylococcus  
1242 aureus and Mycobacterium tuberculosis. Nature communications. 2015;6:10063.  
1243 doi:10.1038/ncomms10063.
- 1244 76. Lan R and Reeves PR. Escherichia coli in disguise: molecular origins of Shigella.  
1245 Microbes and infection. 2002;4 11:1125-32.
- 1246 77. Baker DN and Langmead B. Dashing: Fast and Accurate Genomic Distances with  
1247 HyperLogLog. bioRxiv. 2019:501726. doi:10.1101/501726.
- 1248 78. Jain C, Rodriguez-R LM, Phillippy AM, Konstantinidis KT and Aluru S. High  
1249 throughput ANI analysis of 90K prokaryotic genomes reveals clear species  
1250 boundaries. Nature communications. 2018;9 1:5114. doi:10.1038/s41467-018-07641-  
1251 9.
- 1252 79. Koren S and Phillippy AM. One chromosome, one contig: complete microbial  
1253 genomes from long-read sequencing and assembly. Current opinion in microbiology.  
1254 2015;23:110-20. doi:10.1016/j.mib.2014.11.014.

- 1255 80. Hurgobin B and Edwards D. SNP Discovery Using a Pangenome: Has the Single  
1256 Reference Approach Become Obsolete? *Biology*. 2017;6 1:21.  
1257 doi:10.3390/biology6010021.
- 1258 81. Teer JK, Green ED, Mullikin JC and Biesecker LG. VarSifter: visualizing and  
1259 analyzing exome-scale sequence variation data on a desktop computer.  
1260 *Bioinformatics*. 2012;28 4:599-600. doi:10.1093/bioinformatics/btr711.
- 1261 82. Demirci H and Akgün M. VCF-Explorer: filtering and analysing whole genome VCF  
1262 files. *Bioinformatics*. 2017;33 21:3468-70. doi:10.1093/bioinformatics/btx422.
- 1263 83. Müller H, Jimenez-Heredia R, Krolo A, Hirschmugl T, Dmytrus J, Boztug K, et al.  
1264 VCF.Filter: interactive prioritization of disease-linked genetic variants from  
1265 sequencing data. *Nucleic acids research*. 2017;45 W1:W567-W72.  
1266 doi:10.1093/nar/gkx425.
- 1267 84. Ramraj V and Salatino S. BrowseVCF: a web-based application and workflow to  
1268 quickly prioritize disease-causative variants in VCF files. *Briefings in Bioinformatics*.  
1269 2016;18 5:774-9. doi:10.1093/bib/bbw054.
- 1270 85. NCBI Resource Coordinators. Database Resources of the National Center for  
1271 Biotechnology Information. *Nucleic Acids Res*. 2017;45 D1:D12-d7.  
1272 doi:10.1093/nar/gkw1071.
- 1273 86. Kumar S, Stecher G and Tamura K. MEGA7: Molecular Evolutionary Genetics  
1274 Analysis Version 7.0 for Bigger Datasets. *Mol Biol Evol*. 2016;33 7:1870-4.  
1275 doi:10.1093/molbev/msw054.
- 1276 87. Price A and Gibas C. Simulome: a genome sequence and variant simulator.  
1277 *Bioinformatics*. 2017; doi:10.1093/bioinformatics/btx091.
- 1278 88. Turner FS. Assessment of insert sizes and adapter content in fastq data from  
1279 NexteraXT libraries. *Frontiers in Genetics*. 2014;5:5. doi:10.3389/fgene.2014.00005.
- 1280 89. Turner FS. Assessment of insert sizes and adapter content in fastq data from  
1281 NexteraXT libraries. *Frontiers in genetics*. 2014;5:5-. doi:10.3389/fgene.2014.00005.
- 1282 90. Broad Institute: Picard: A set of command line tools (in Java) for manipulating high-  
1283 throughput sequencing (HTS) data and formats such as SAM/BAM/CRAM and VCF.  
1284 <http://broadinstitute.github.io/picard/> (2018).
- 1285 91. Eyre DW, Cule ML, Wilson DJ, Griffiths D, Vaughan A, O'Connor L, et al. Diverse  
1286 Sources of *C. difficile* Infection Identified on Whole-Genome Sequencing. *New*  
1287 *England Journal of Medicine*. 2013;369 13:1195-205. doi:10.1056/NEJMoa1216064.
- 1288 92. Jia P, Li F, Xia J, Chen H, Ji H, Pao W, et al. Consensus rules in variant detection  
1289 from next-generation sequencing data. *PLoS ONE*. 2012;7 6:e38470-e.  
1290 doi:10.1371/journal.pone.0038470.
- 1291 93. Wood DE and Salzberg SL. Kraken: ultrafast metagenomic sequence classification  
1292 using exact alignments. *Genome Biology*. 2014;15 3:R46. doi:10.1186/gb-2014-15-3-  
1293 r46.
- 1294 94. Mende DR, Letunic I, Huerta-Cepas J, Li SS, Forslund K, Sunagawa S, et al.  
1295 proGenomes: a resource for consistent functional and taxonomic annotations of  
1296 prokaryotic genomes. *Nucleic acids research*. 2017;45 D1:D529-D34.  
1297 doi:10.1093/nar/gkw989.
- 1298 95. O'Leary NA, Wright MW, Brister JR, Ciufu S, Haddad D, McVeigh R, et al.  
1299 Reference sequence (RefSeq) database at NCBI: current status, taxonomic expansion,  
1300 and functional annotation. *Nucleic Acids Res*. 2016;44 D1:D733-45.  
1301 doi:10.1093/nar/gkv1189.
- 1302 96. Koren S, Walenz BP, Berlin K, Miller JR, Bergman NH and Phillippy AM. Canu:  
1303 scalable and accurate long-read assembly via adaptive k-mer weighting and repeat  
1304 separation. *Genome Research*. 2017;27 5:722-36. doi:10.1101/gr.215087.116.

- 1305 97. Torchiano M: effsize: Efficient Effect Size Computation (R package version 0.5.4).  
1306 <http://cran.r-project.org/web/packages/effsize/index.html> (2015).  
1307 98. Romano J, Kromrey JD, Coraggio J and Skowronek J. Appropriate statistics for  
1308 ordinal level data: should we really be using t-test and Cohen's d for evaluating group  
1309 differences on the NSSE and other surveys? *Annual Meeting of the Florida*  
1310 *Association of Institutional Research*. Cocoa Beach, Florida, USA2006.  
1311

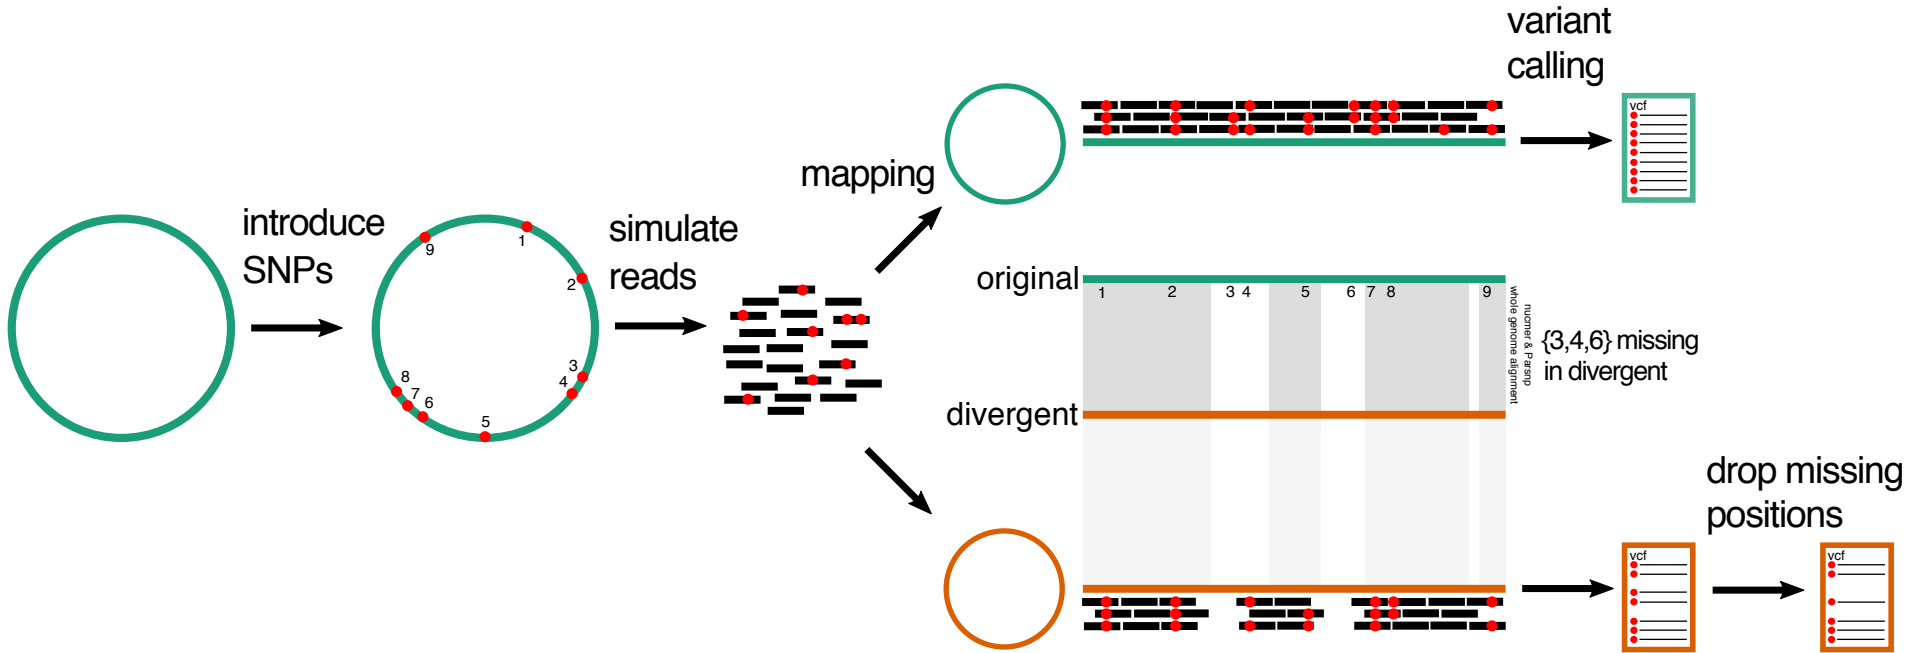

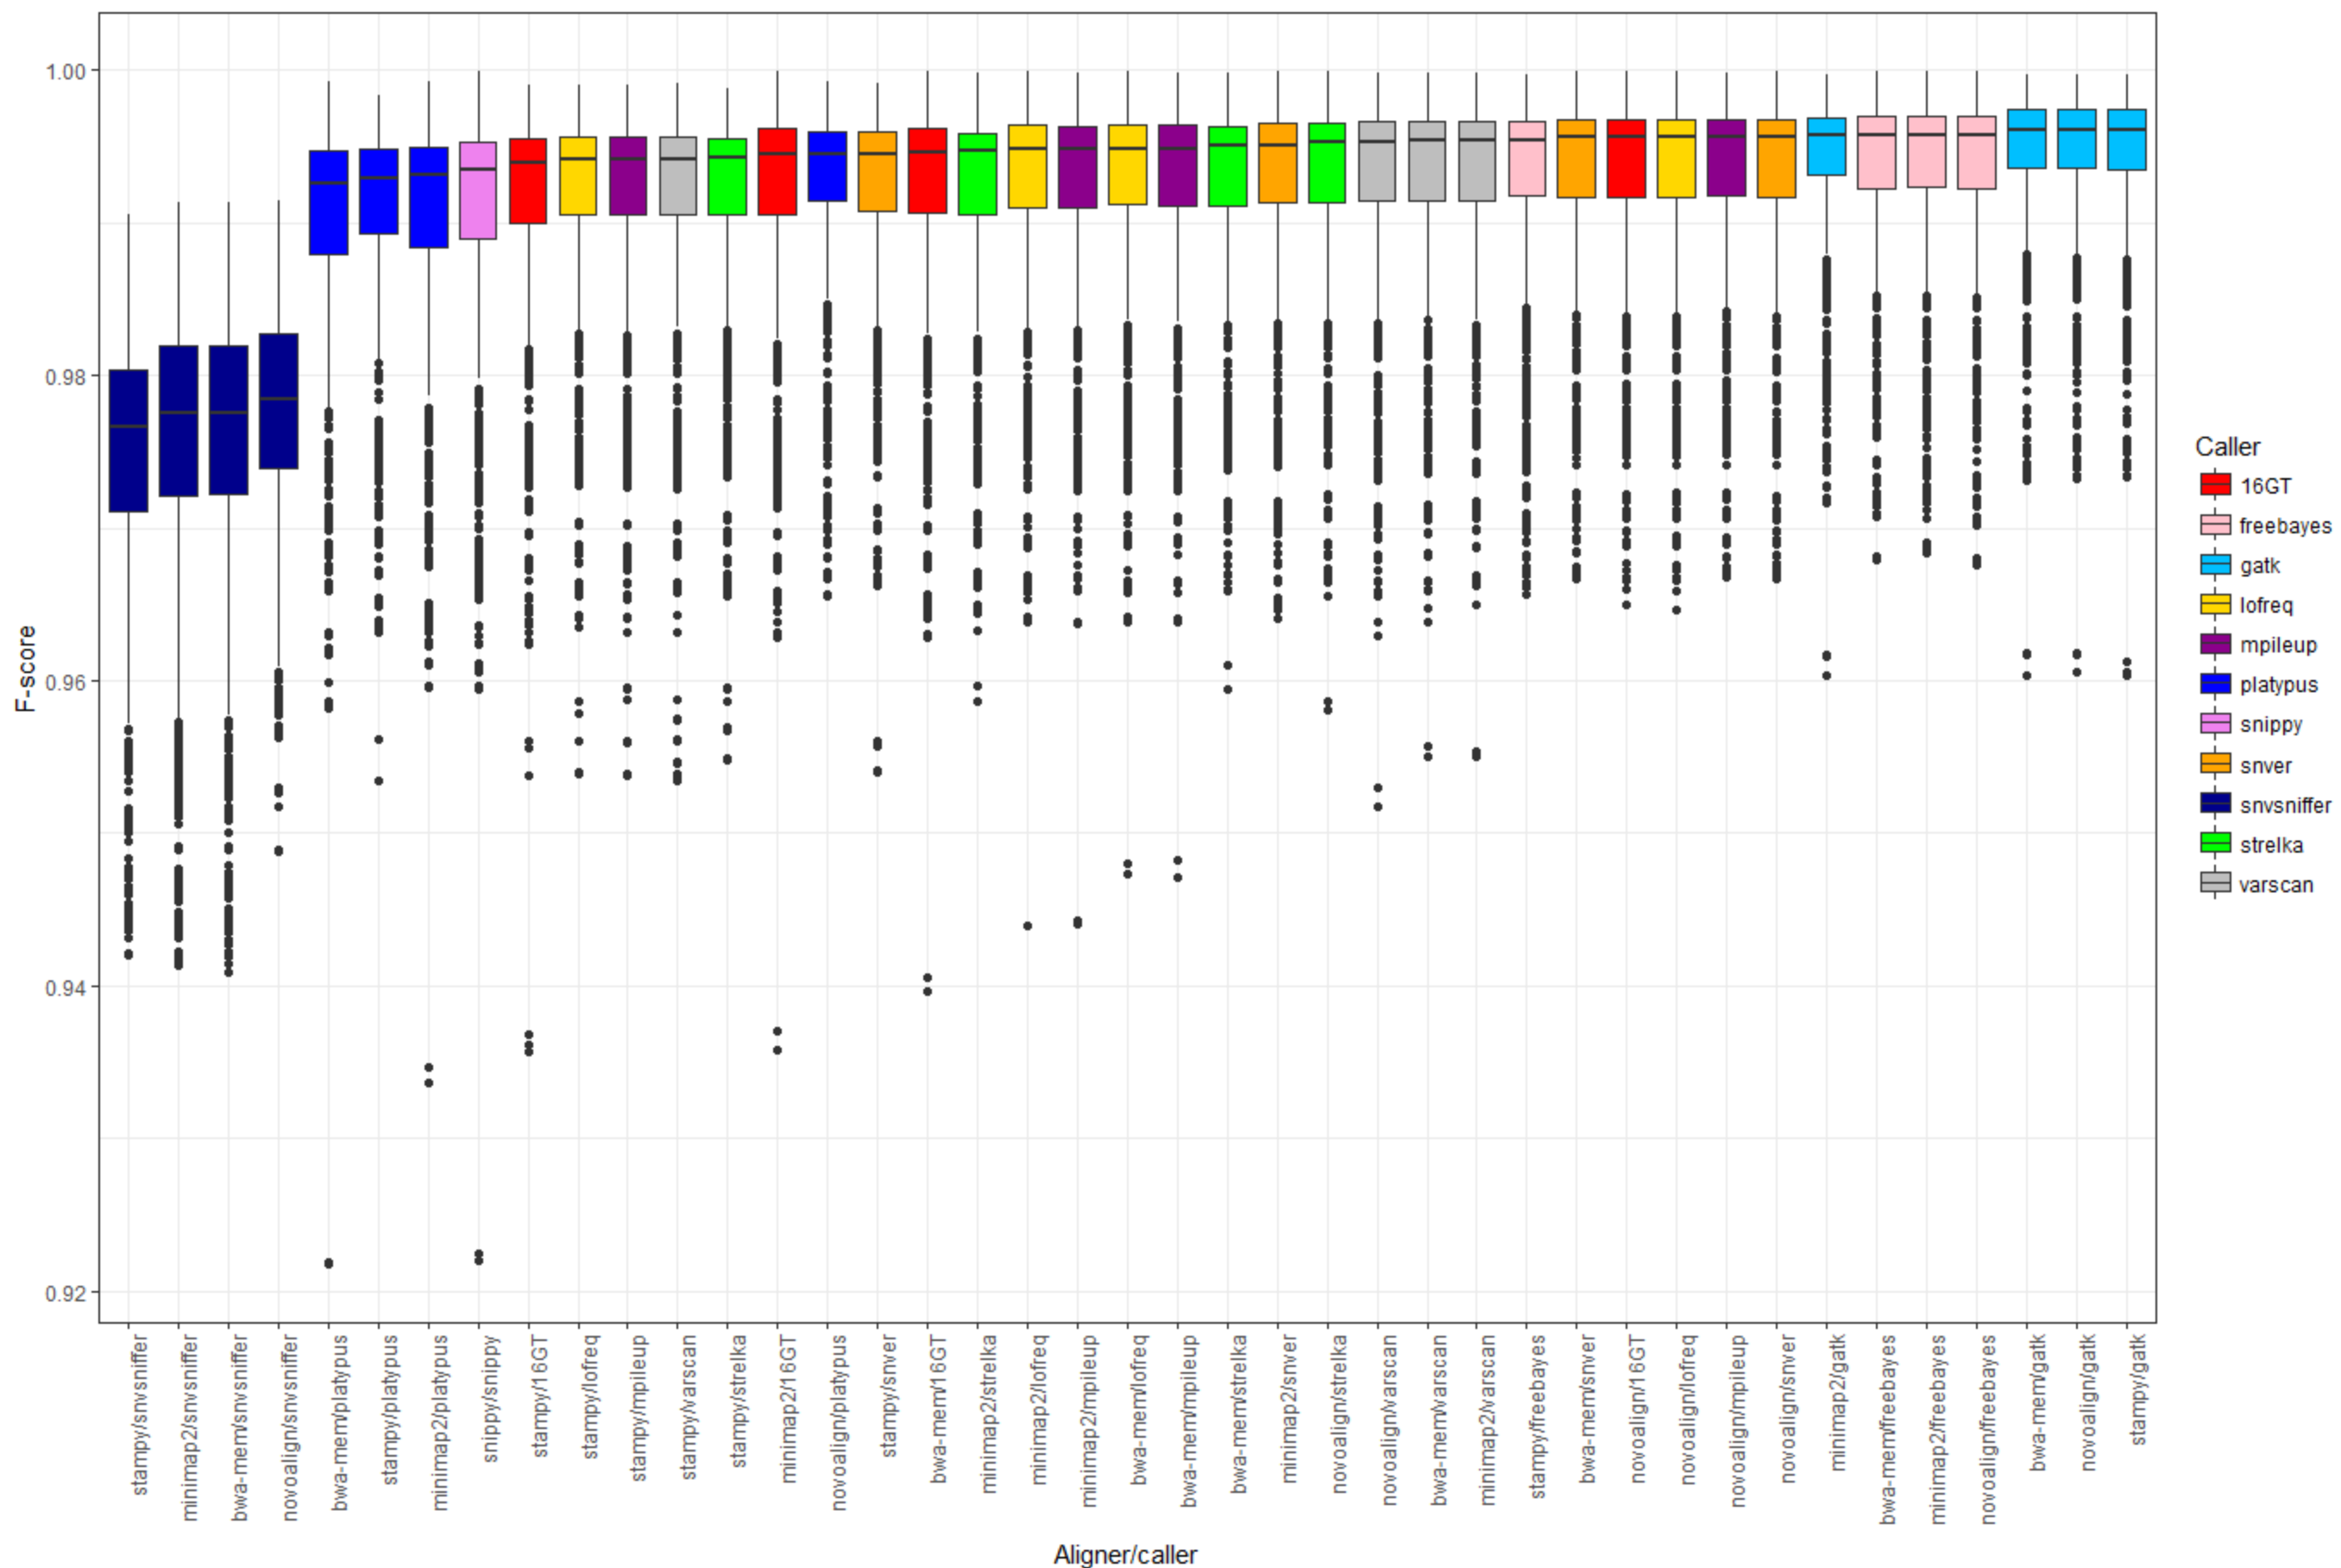

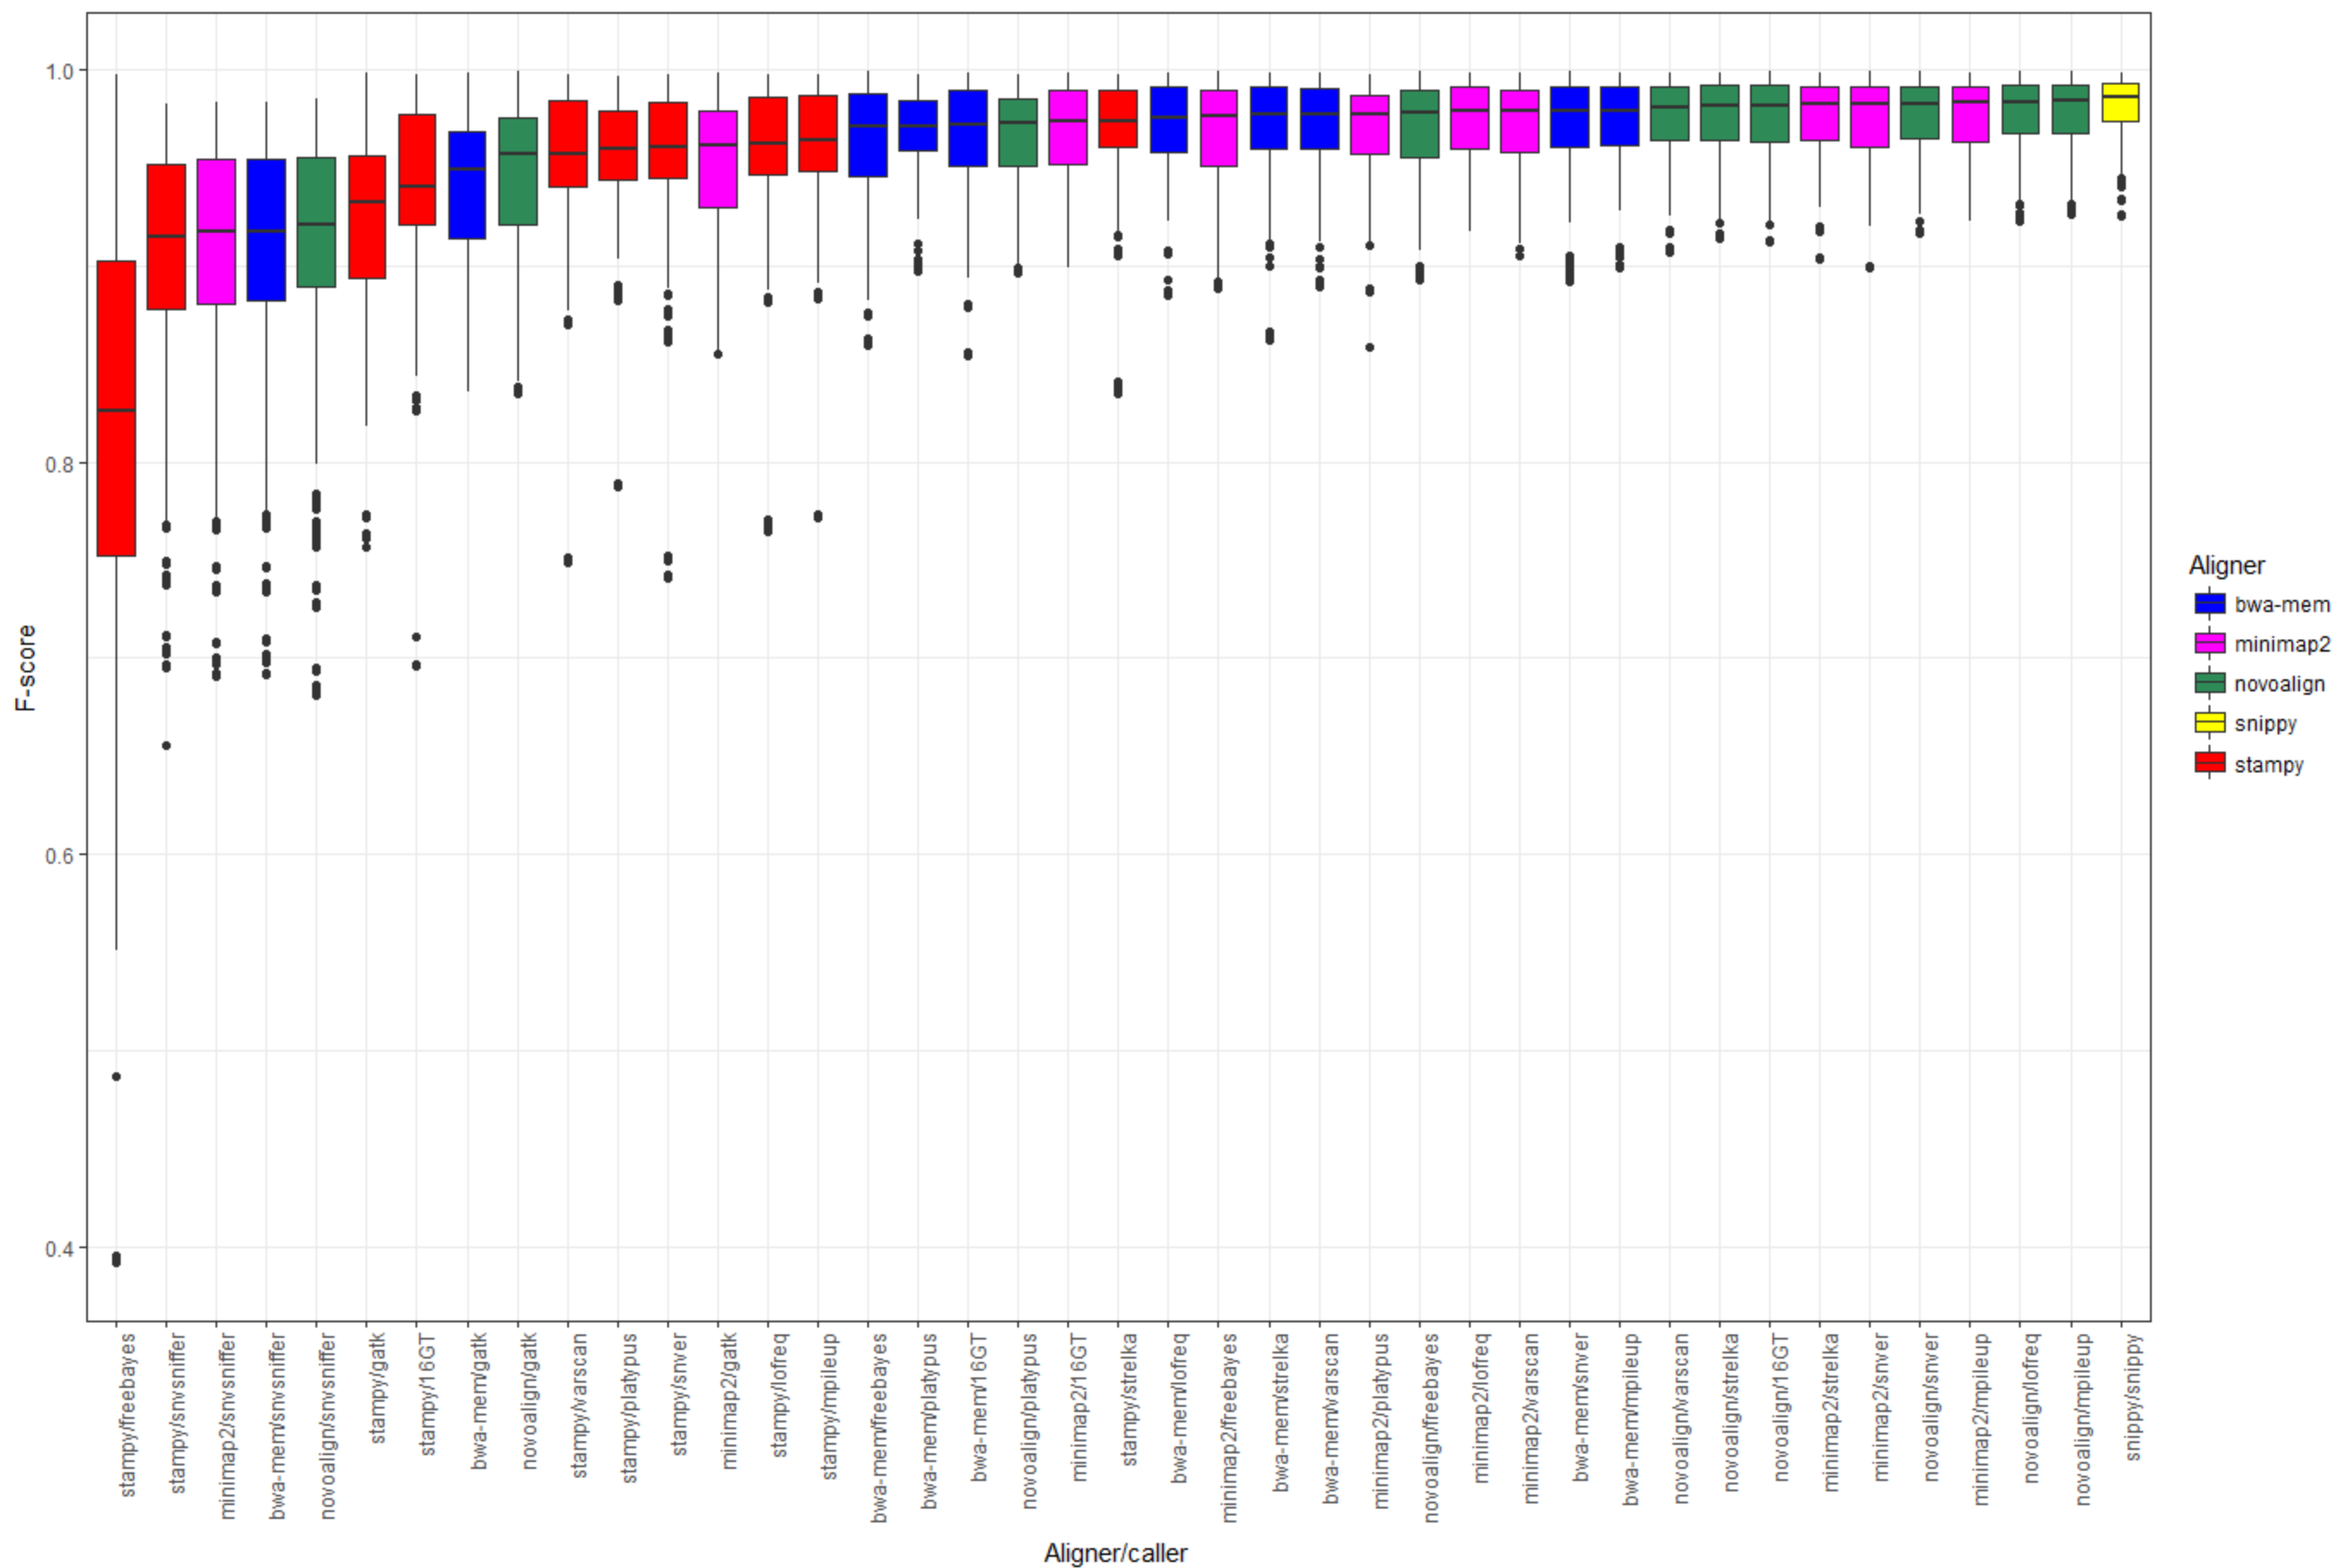



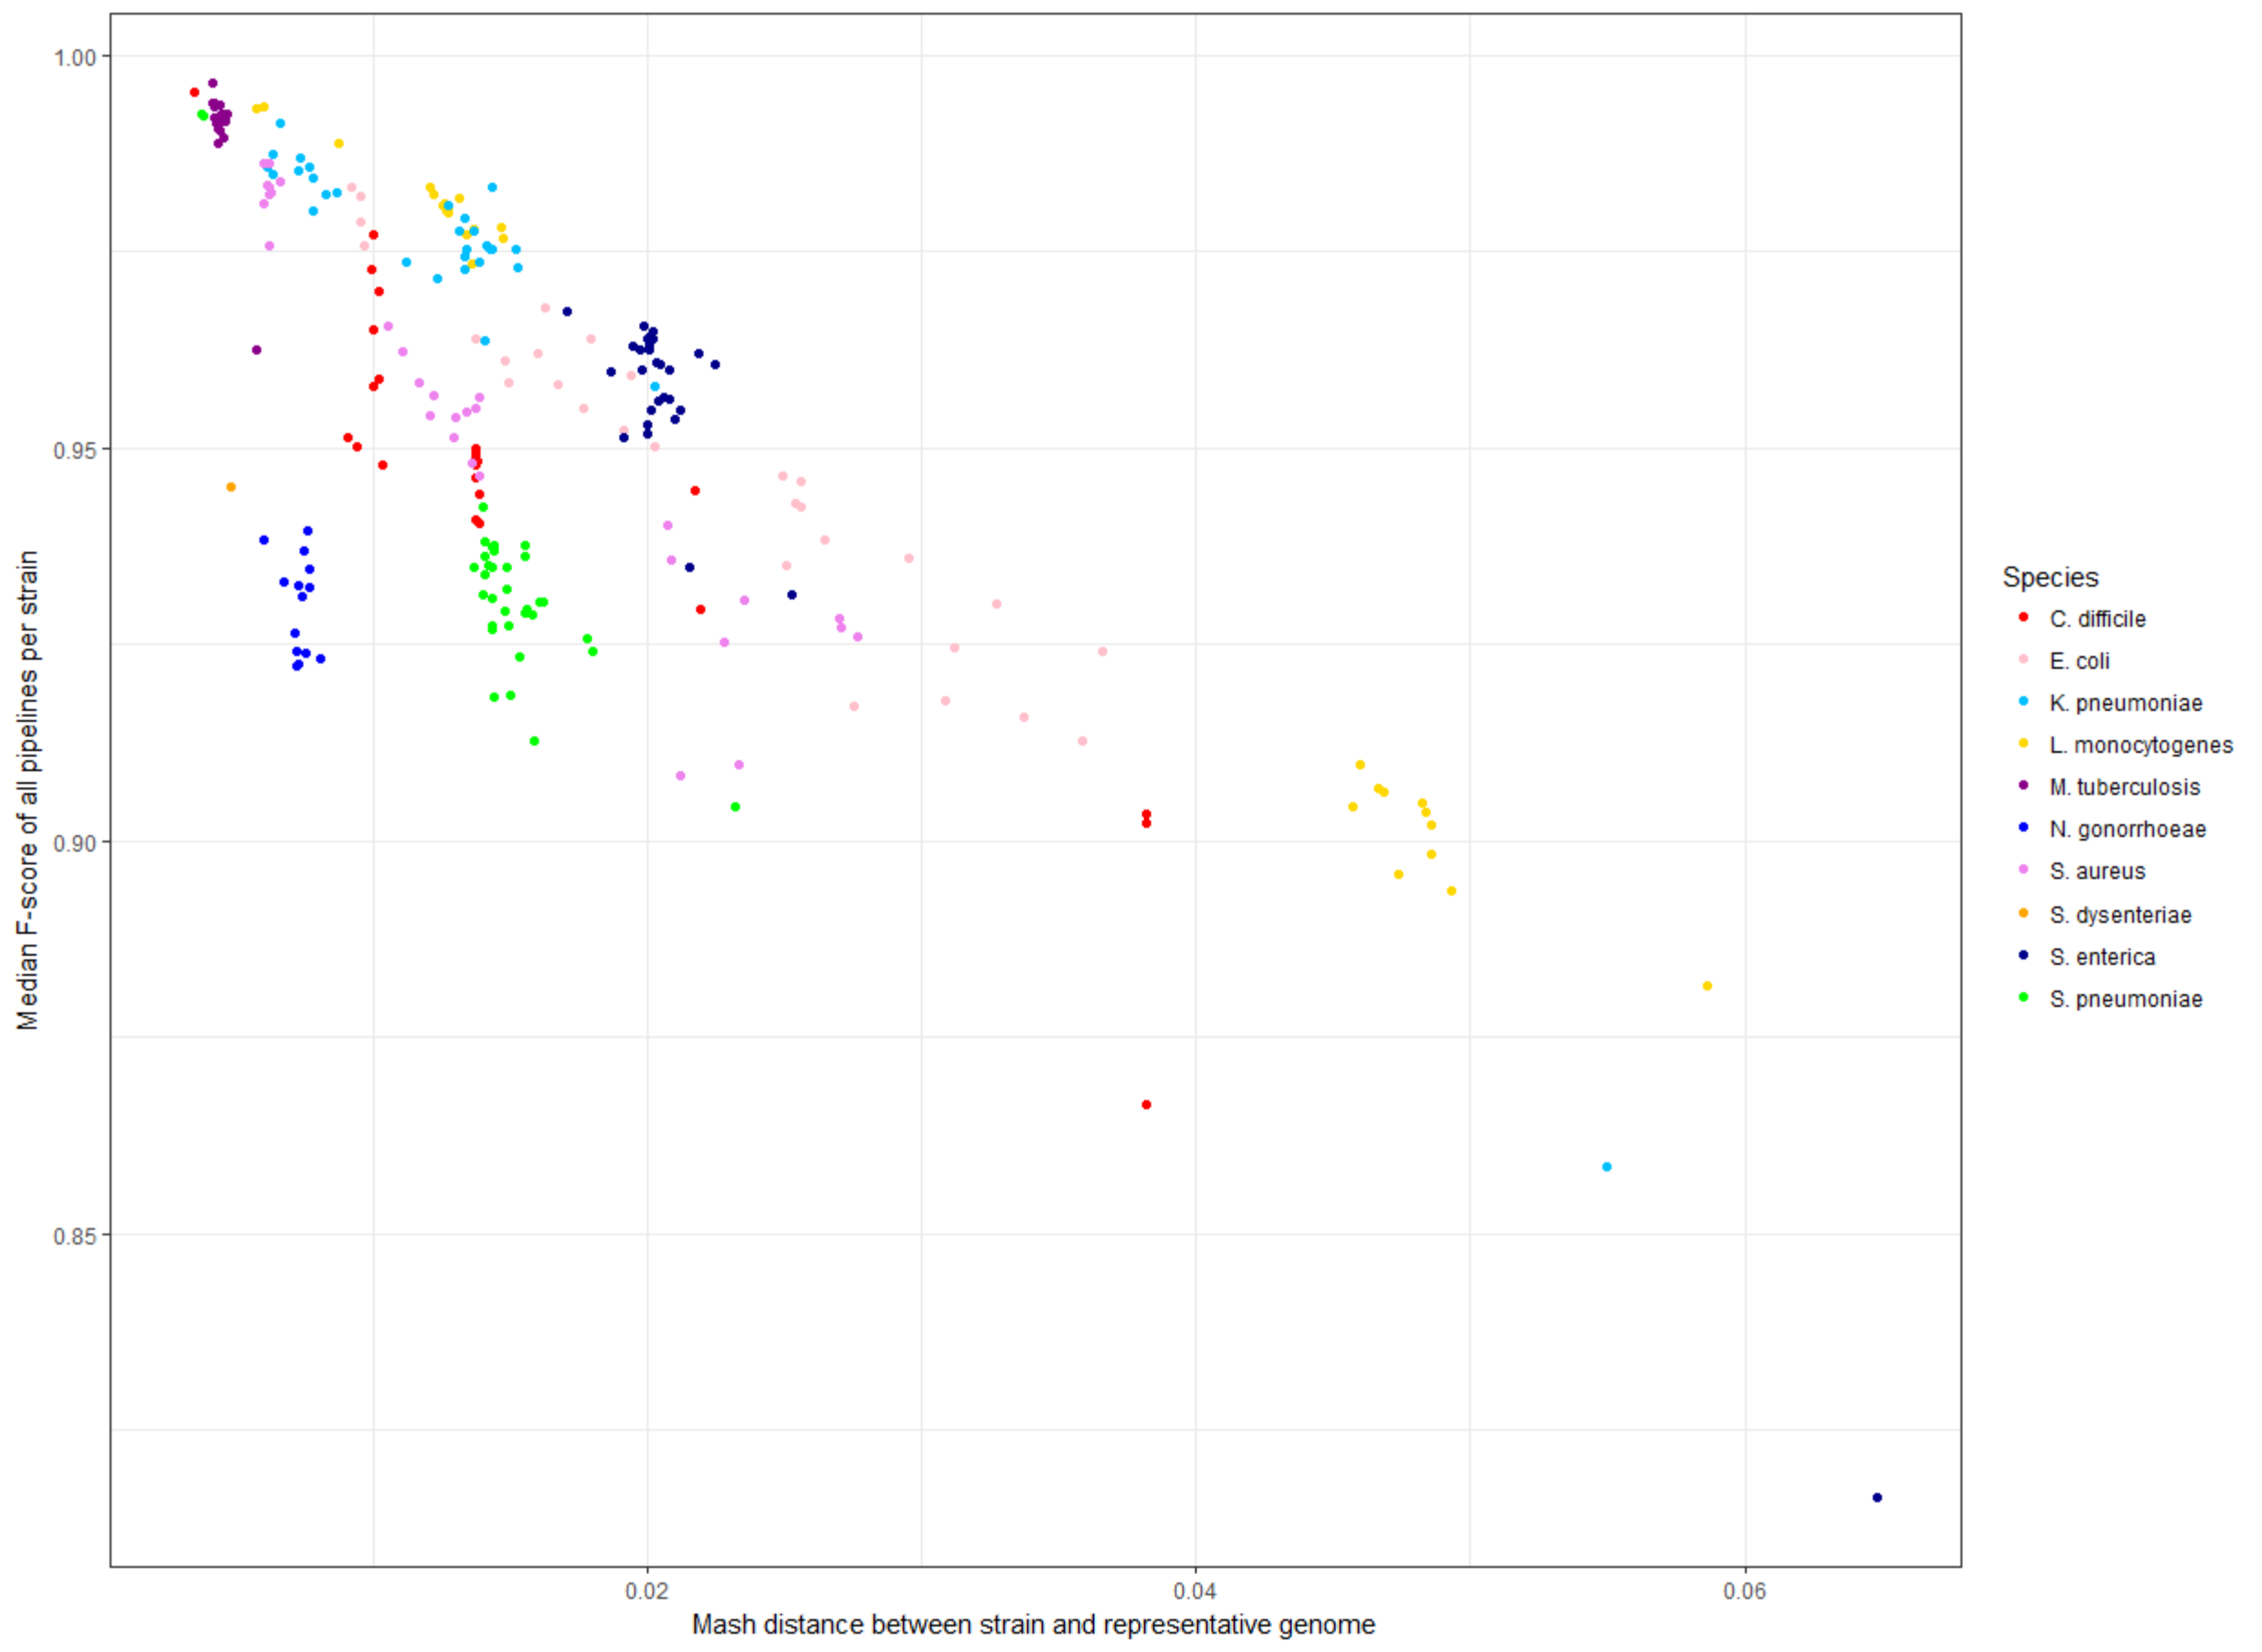

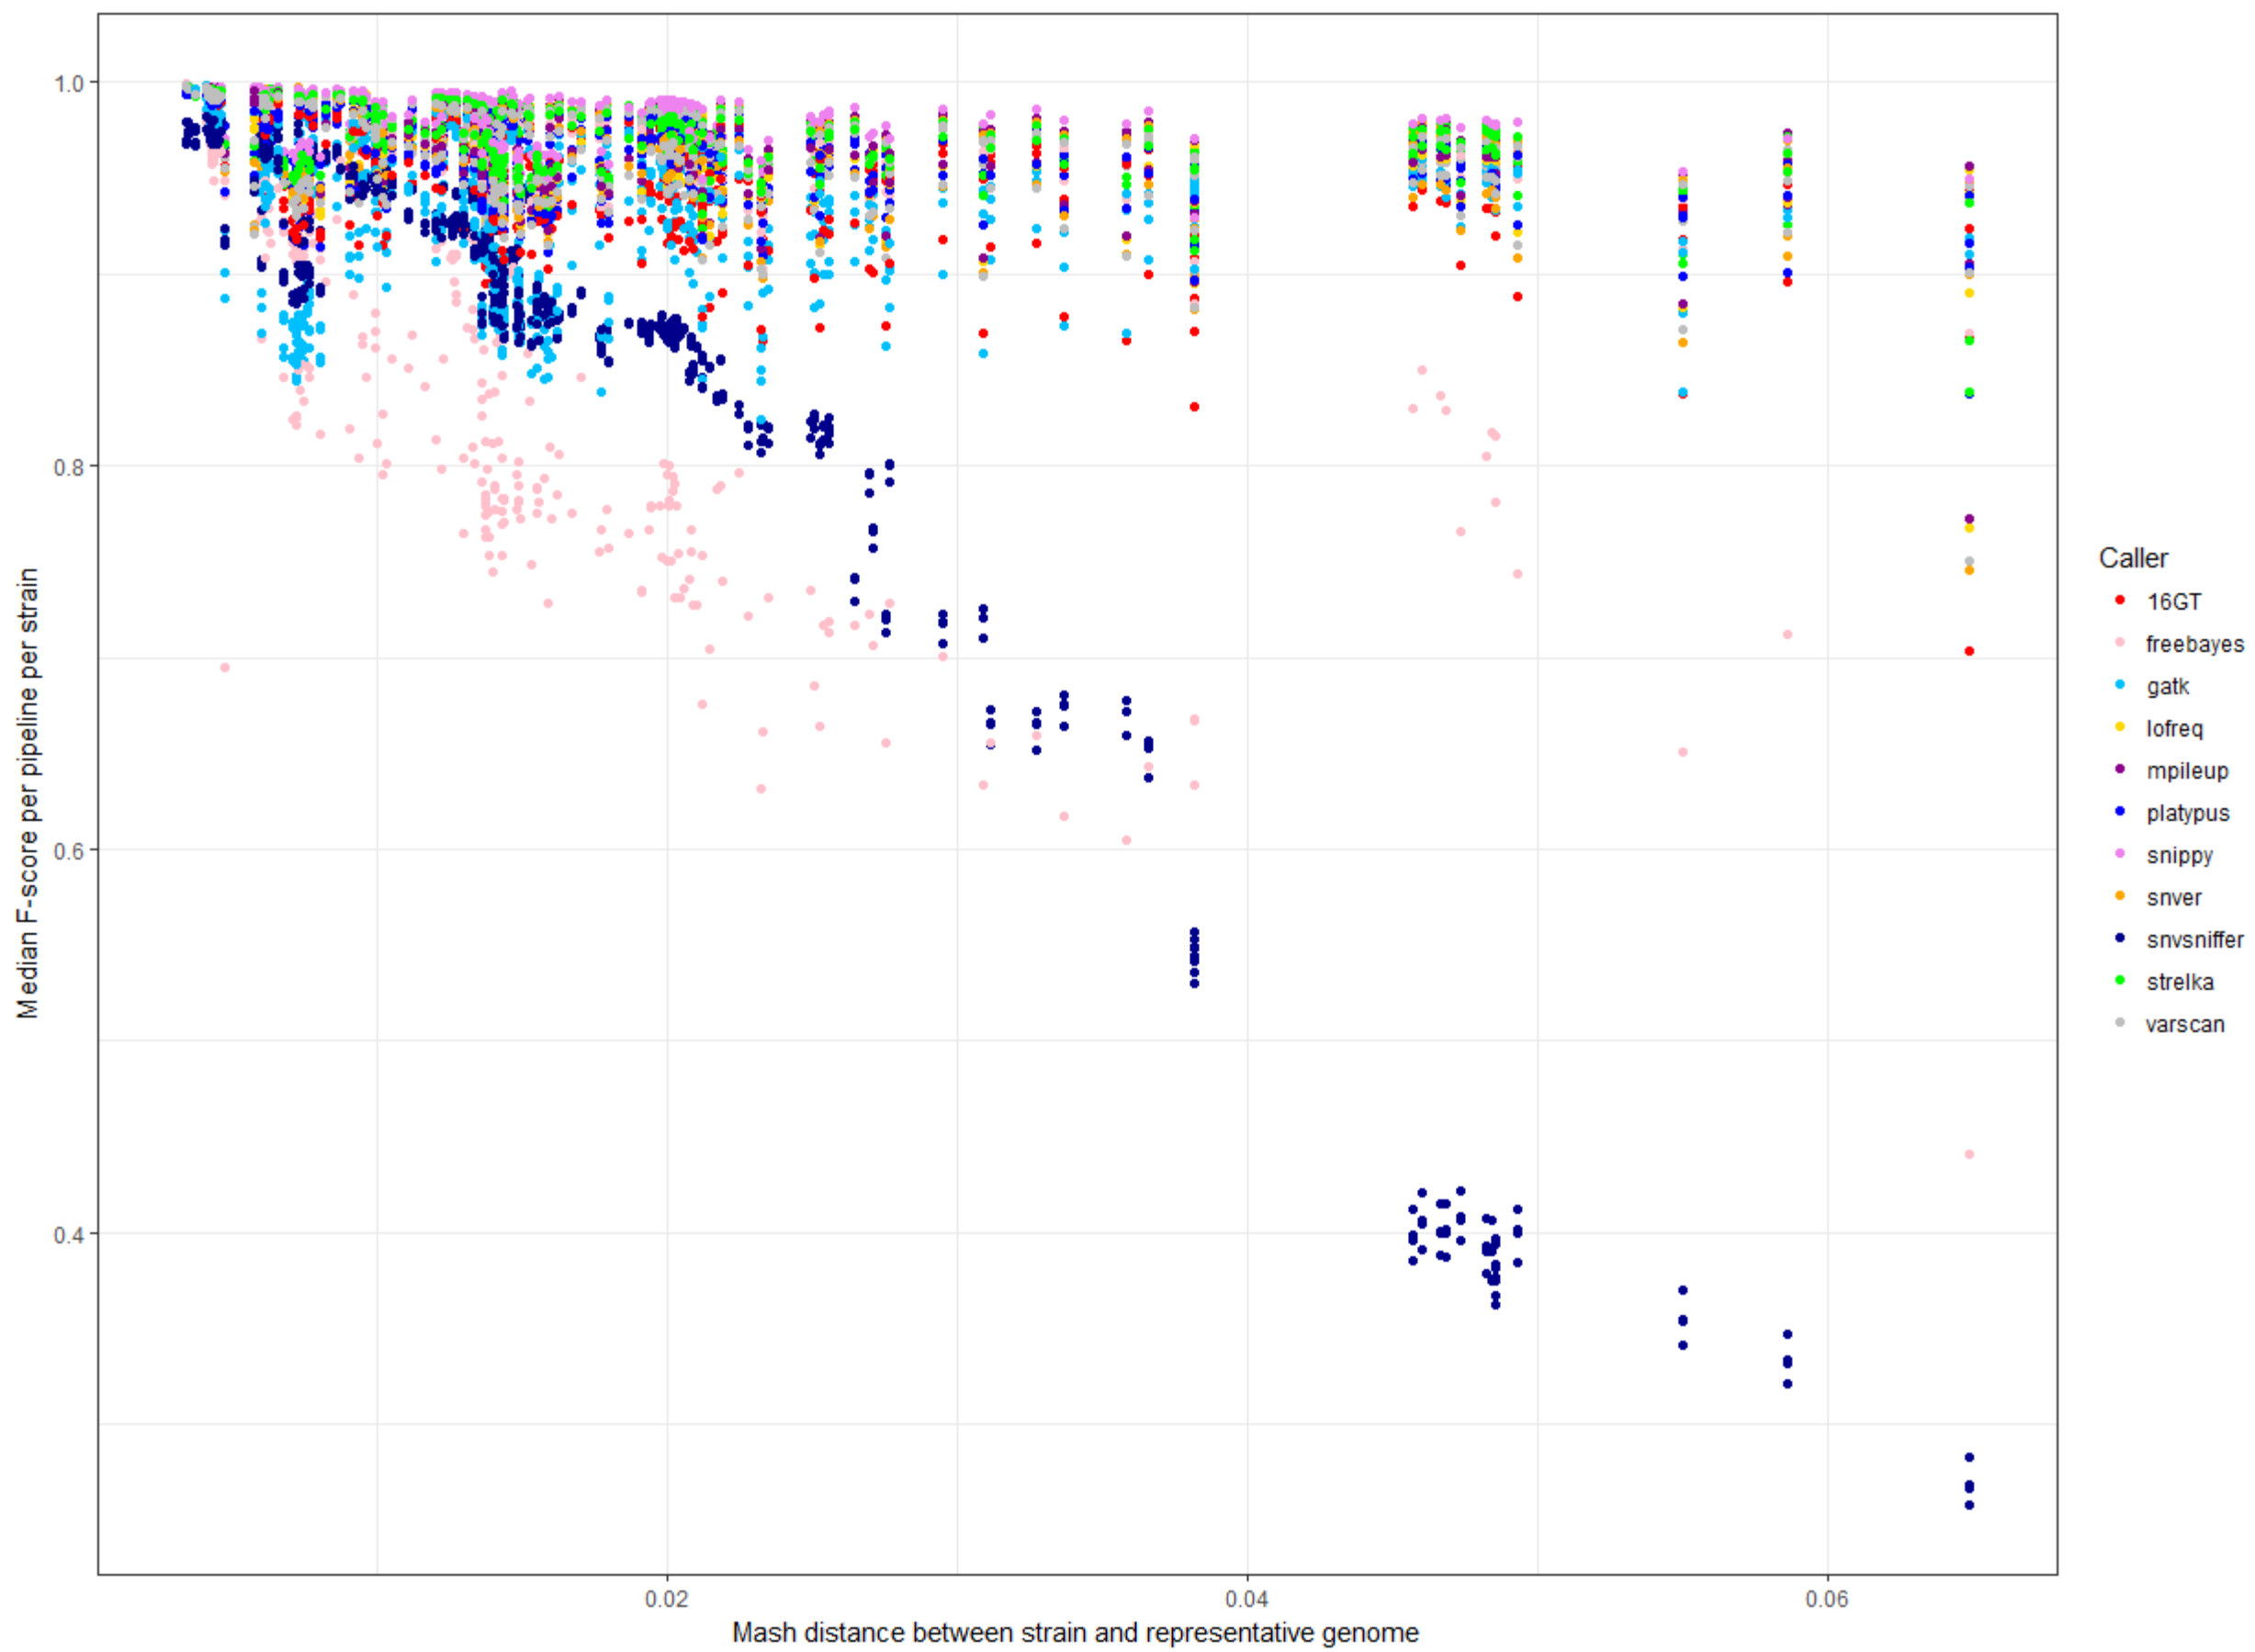

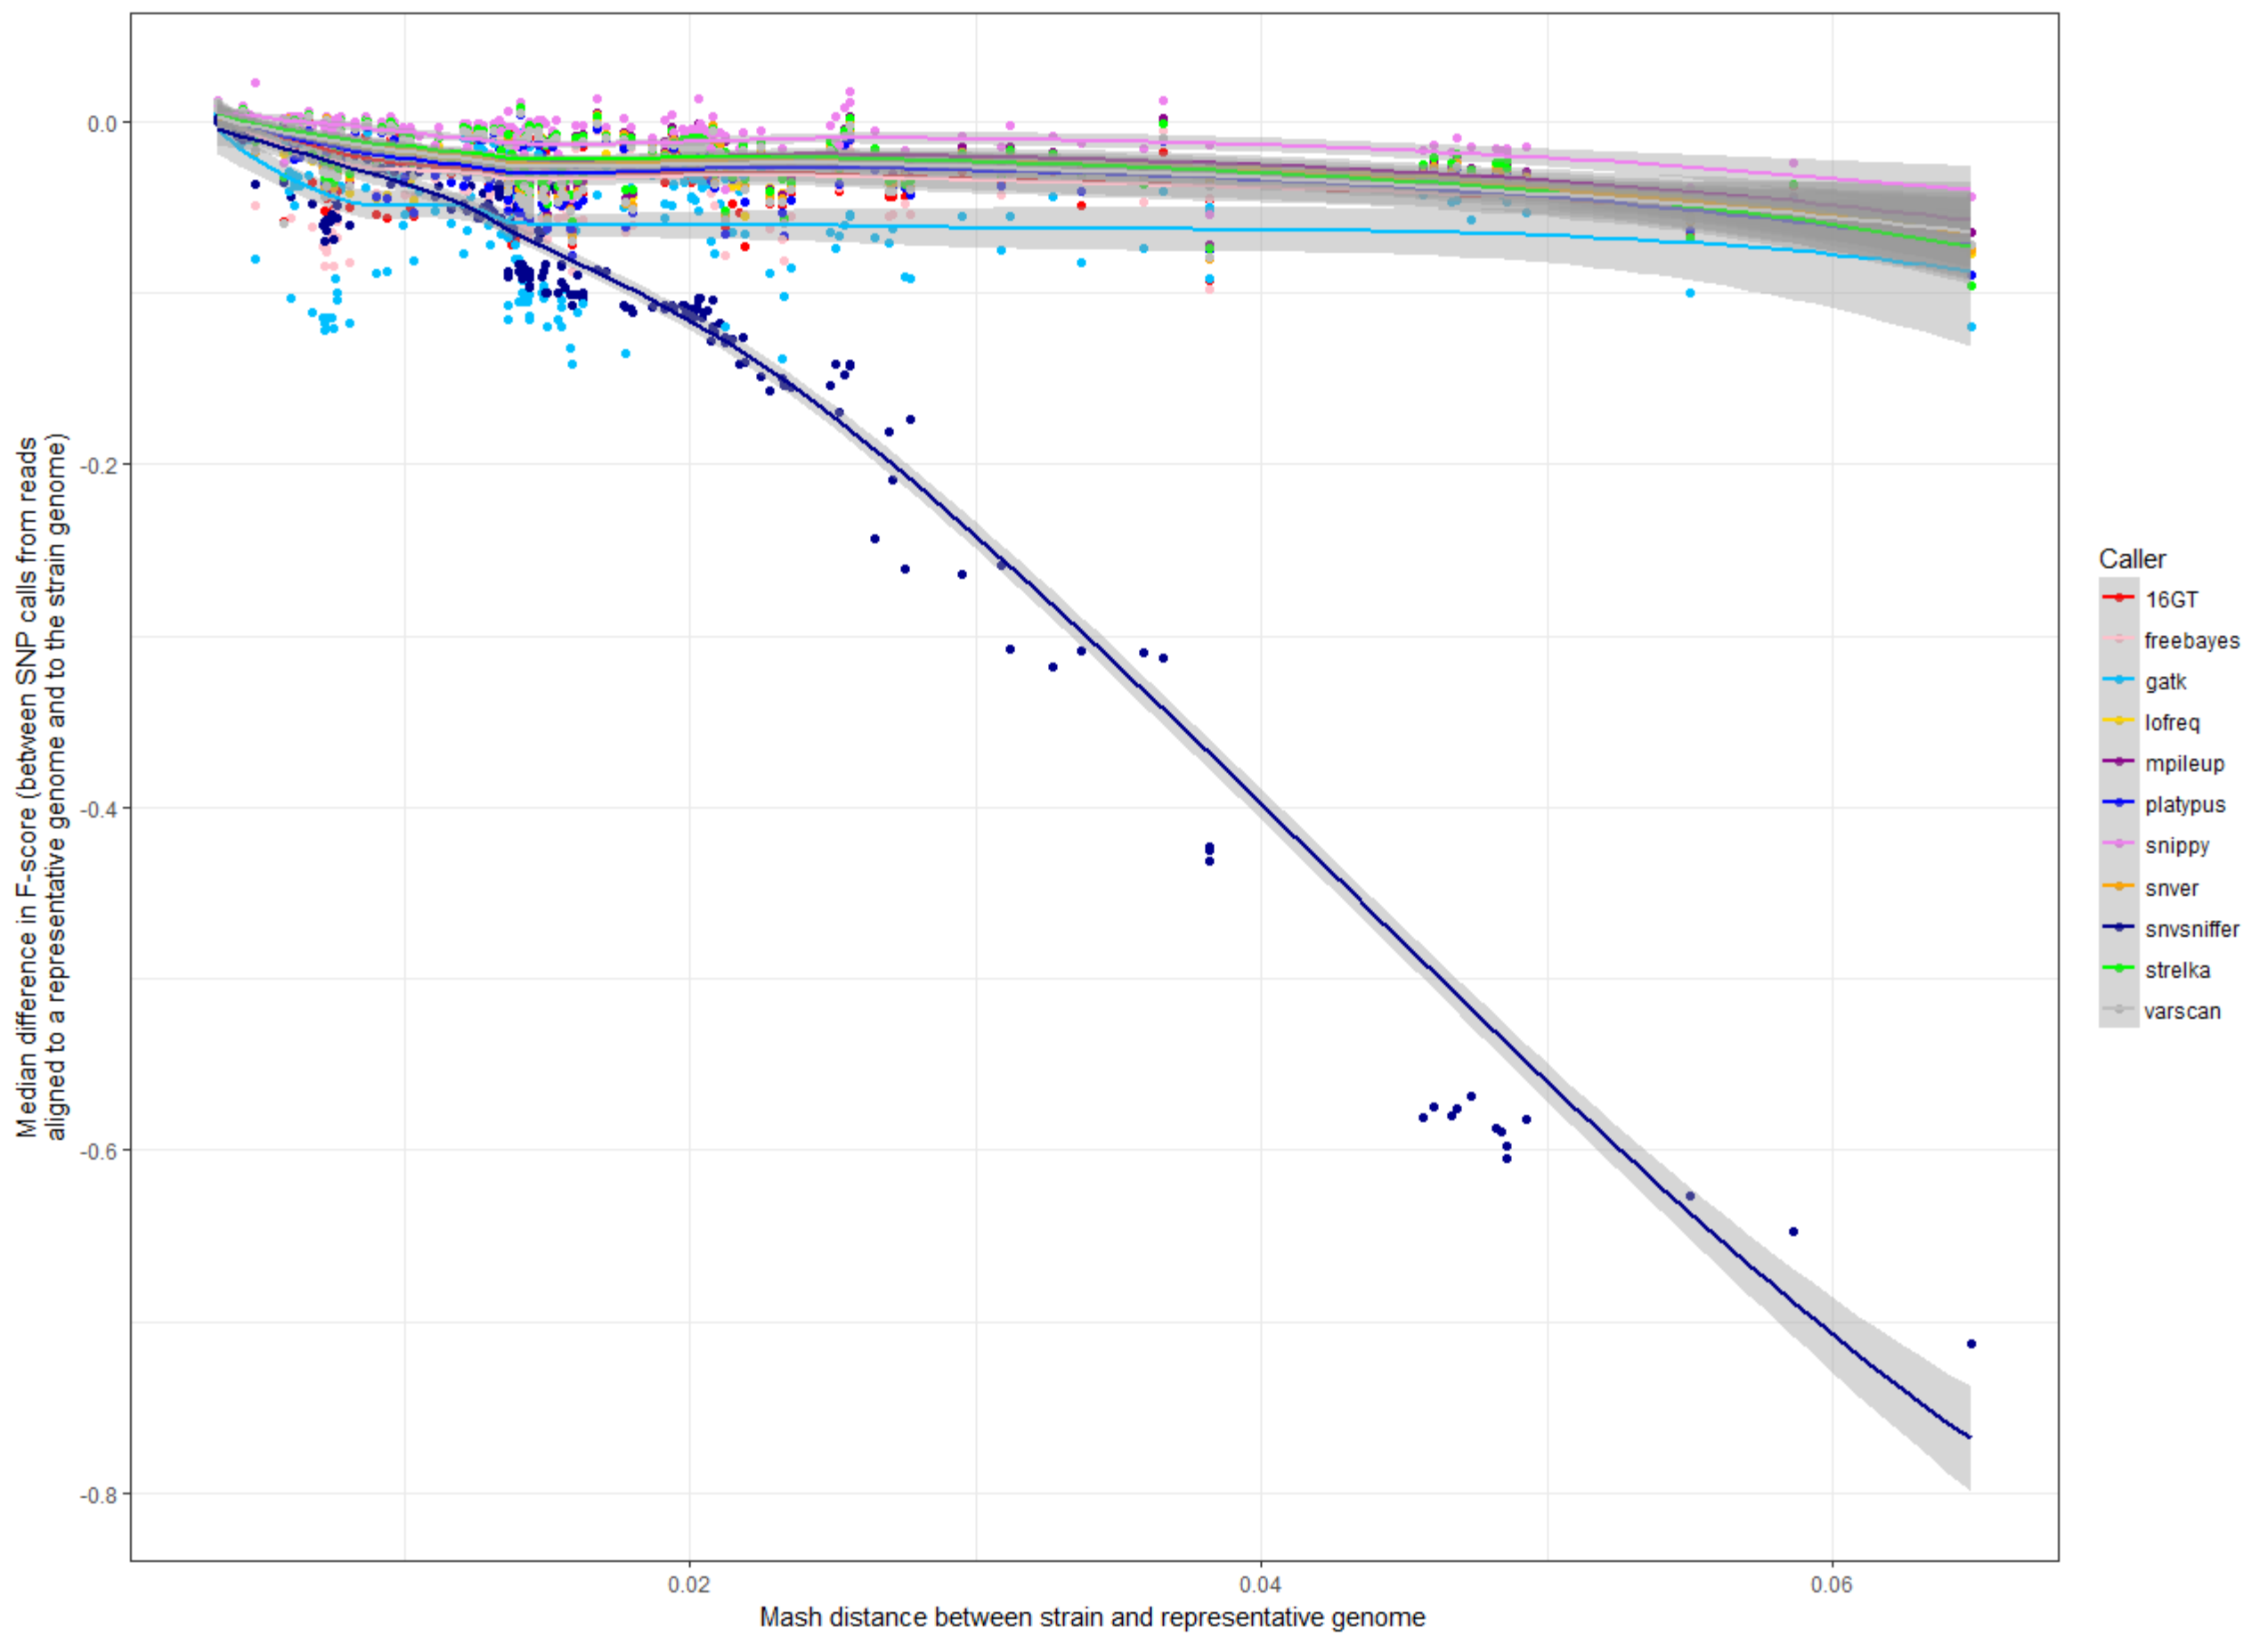

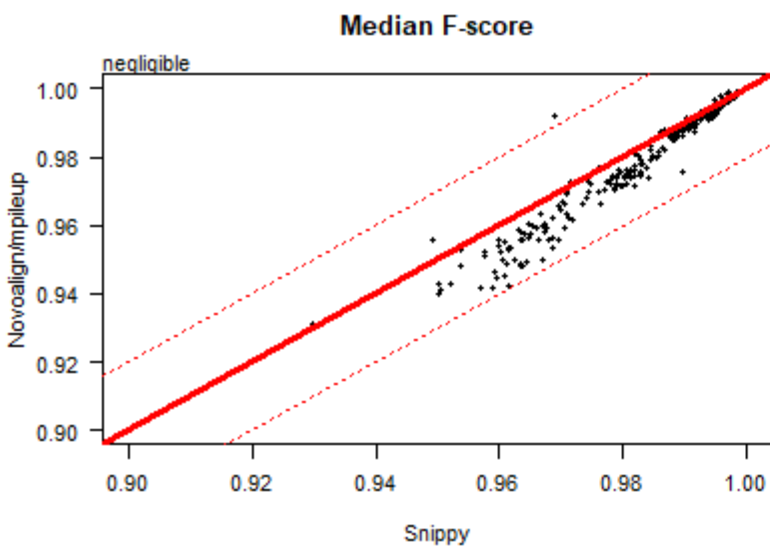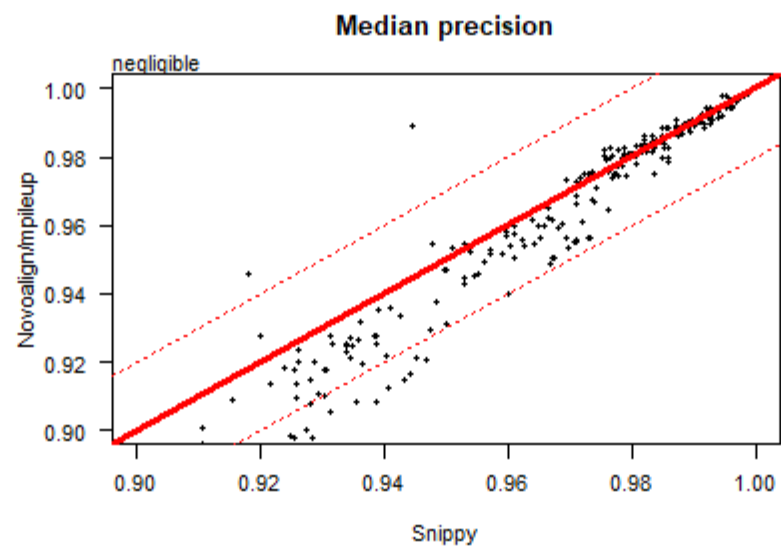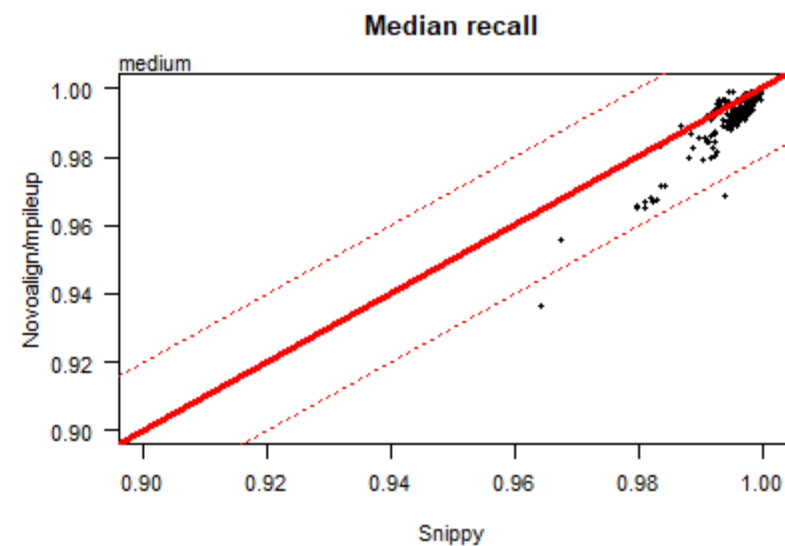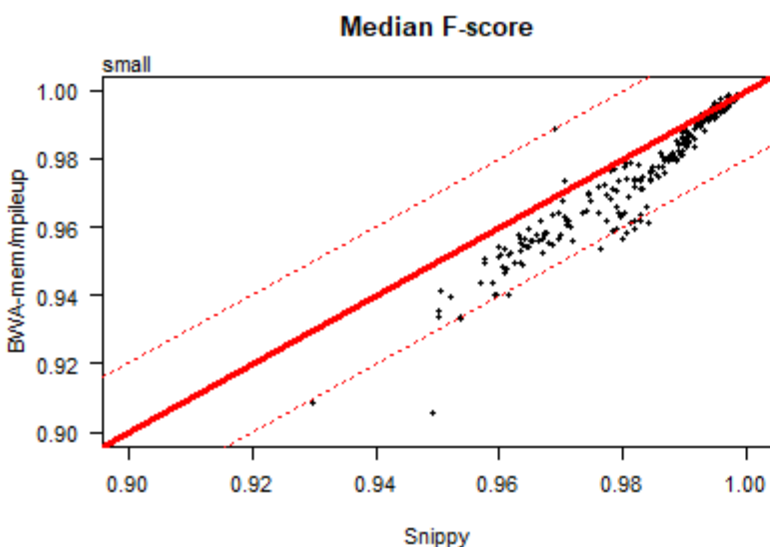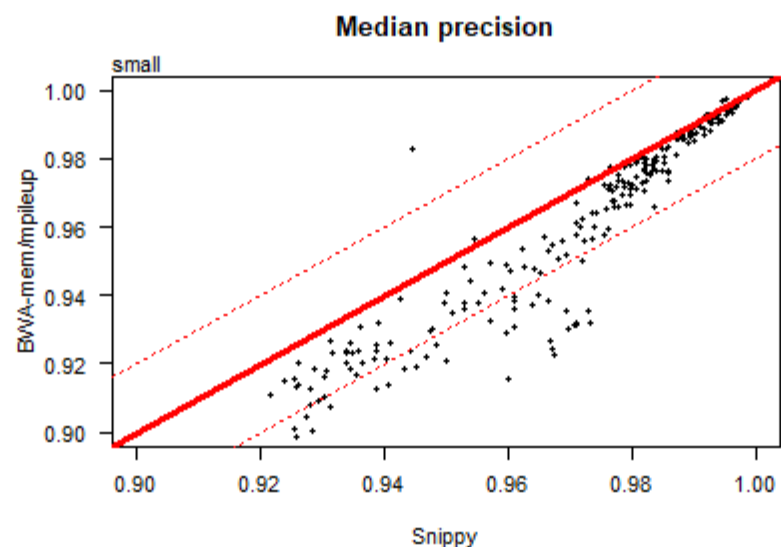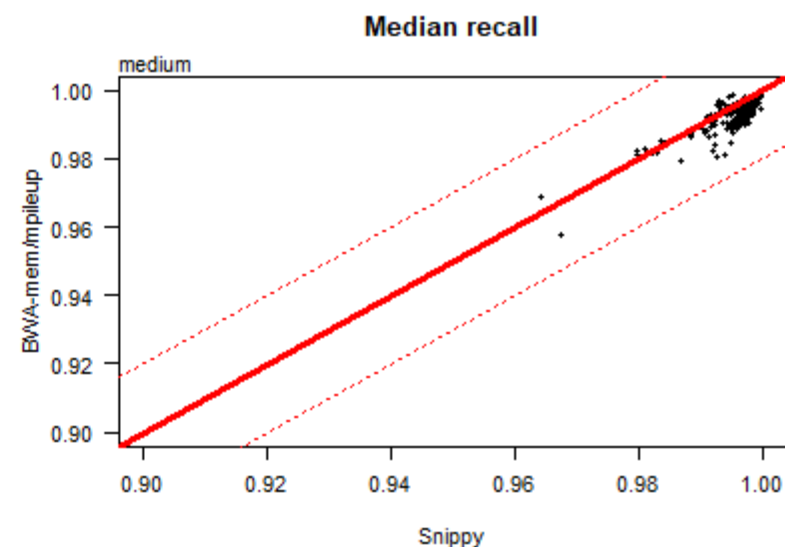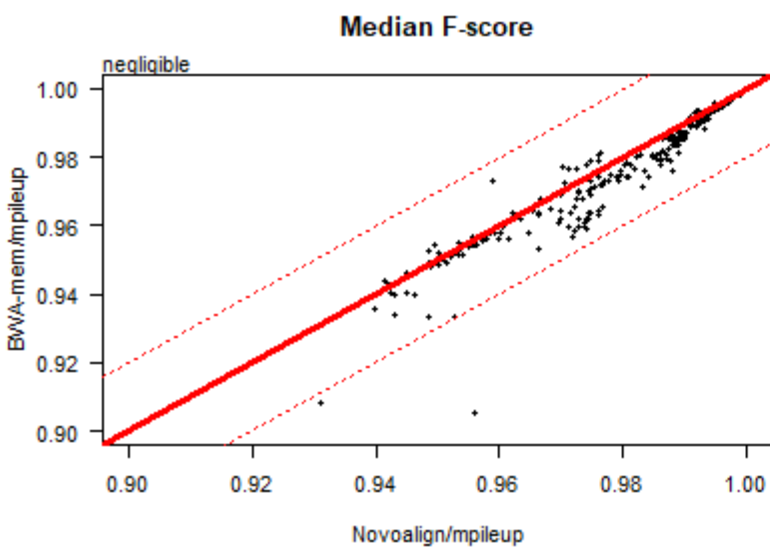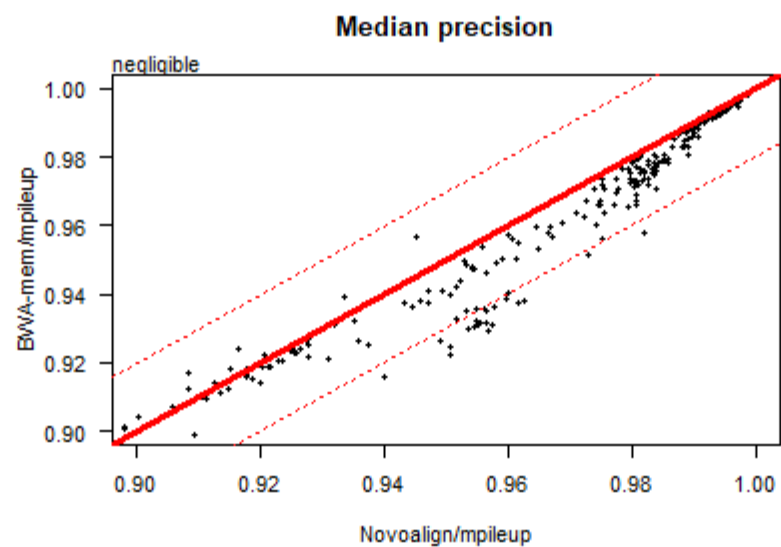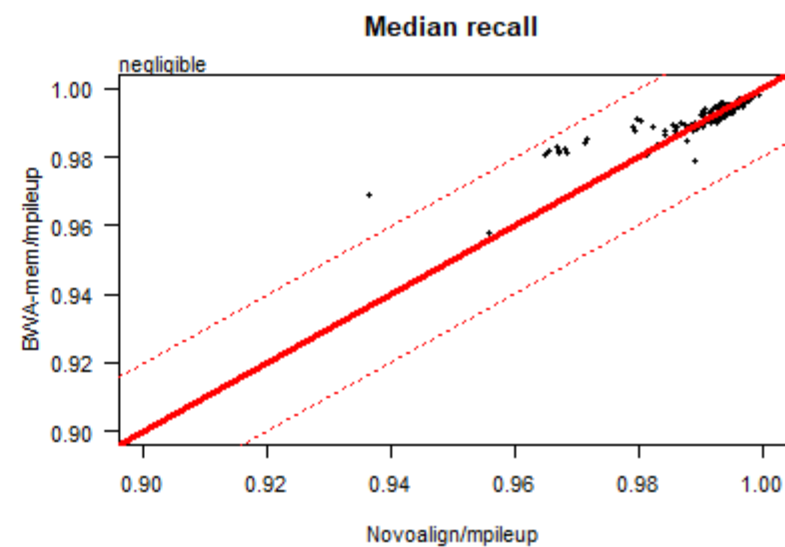

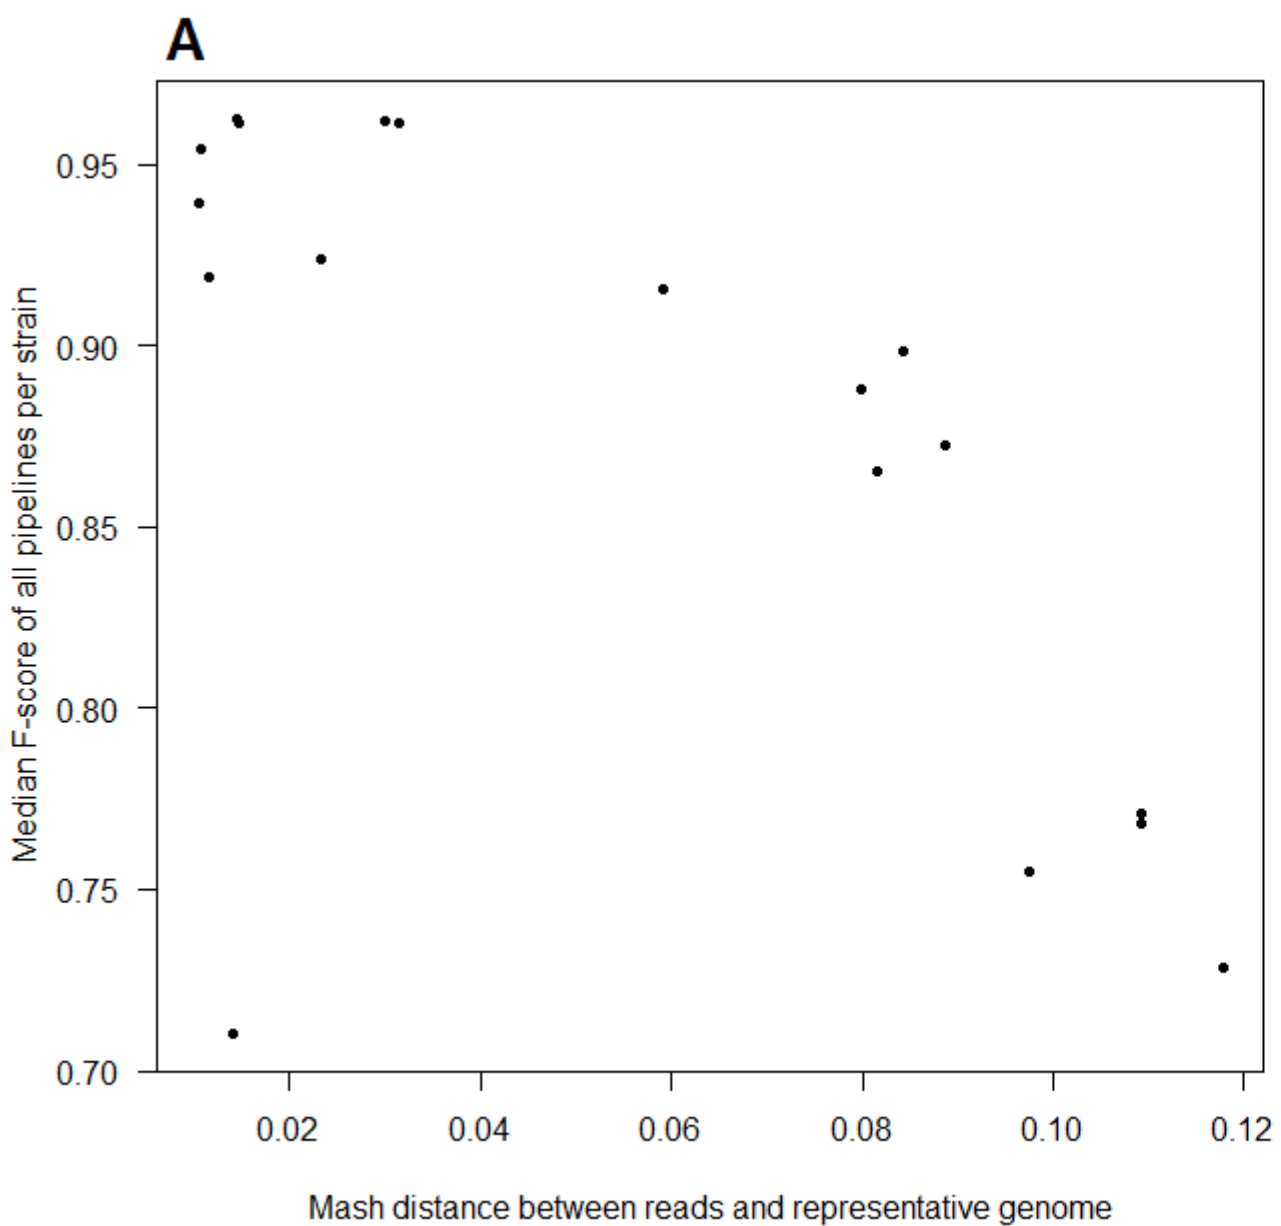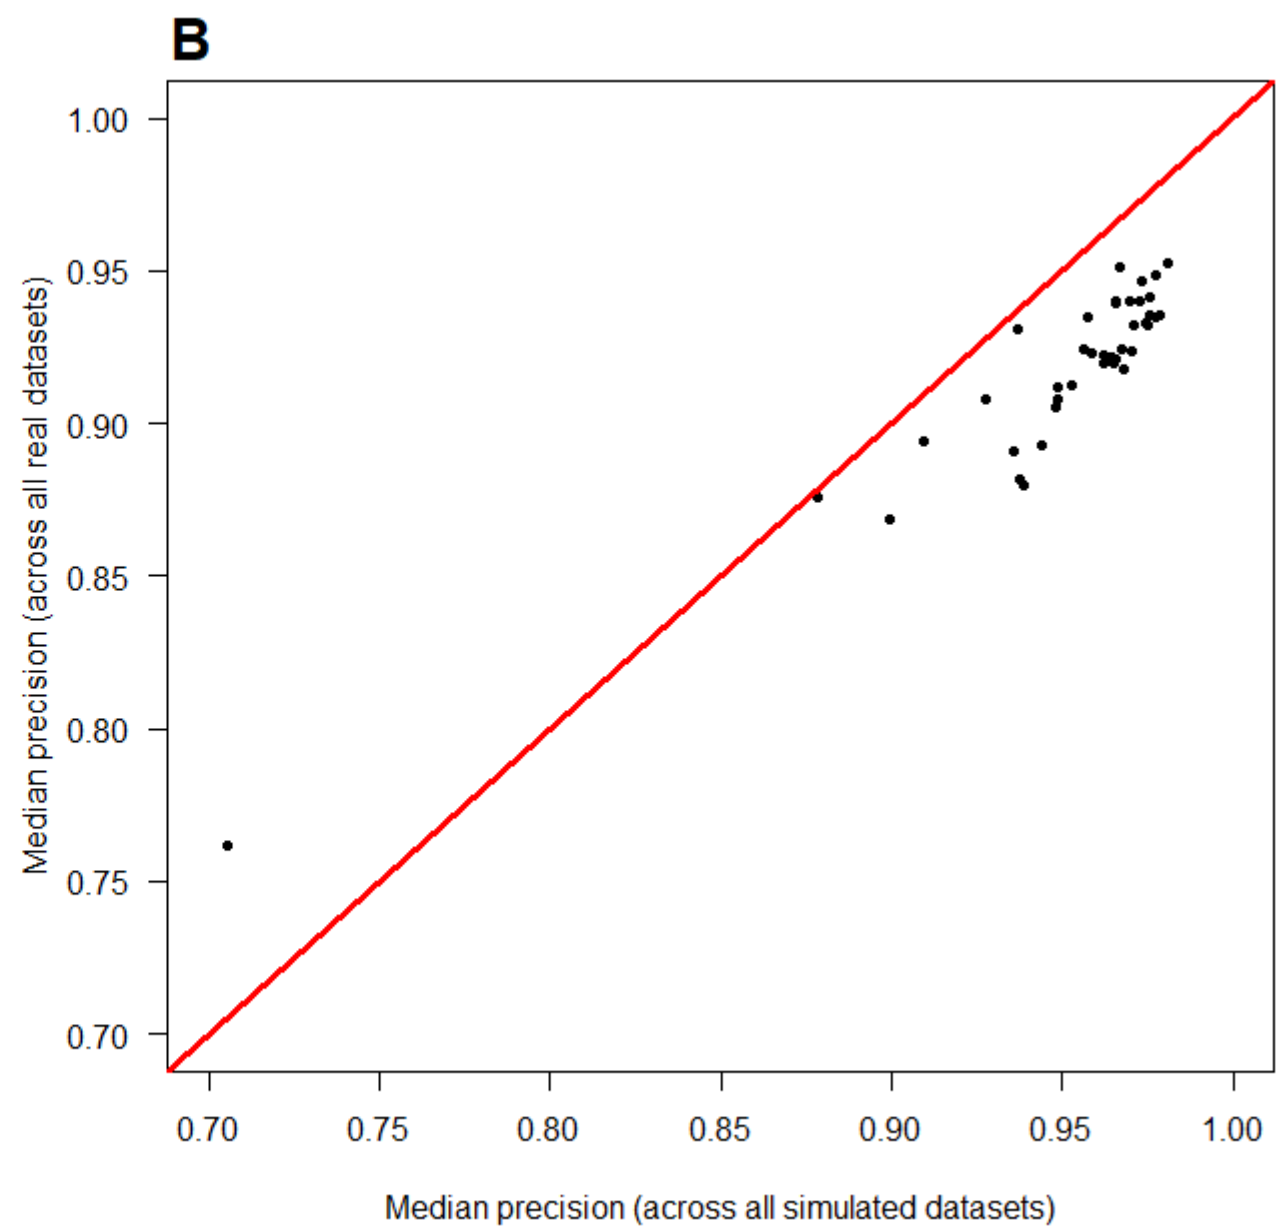

Source: https://www.biorxiv.org/content/10.1101/653774v1.full.pdf
